# Supplementary material for: ERAMOSA controls lateral branching in snapdragon
Source: PubMed Central journal article supplement (PMC5286501; doi:10.1038/srep41319), 2017-02-01
Supplement: srep41319-s1.pdf [file srep41319-s1.pdf]

## **SUPPLEMENTARY INFORMATION**

### **ERAMOSIA controls lateral branching in snapdragon**

Chiara Mizzotti, Bianca M. Galliani, Ludovico Dreni, Hans Sommer, Aureliano Bombarely and  
Simona Masiero

**Figure S1. Antirrhinum wild-type inflorescence is an indeterminate raceme**

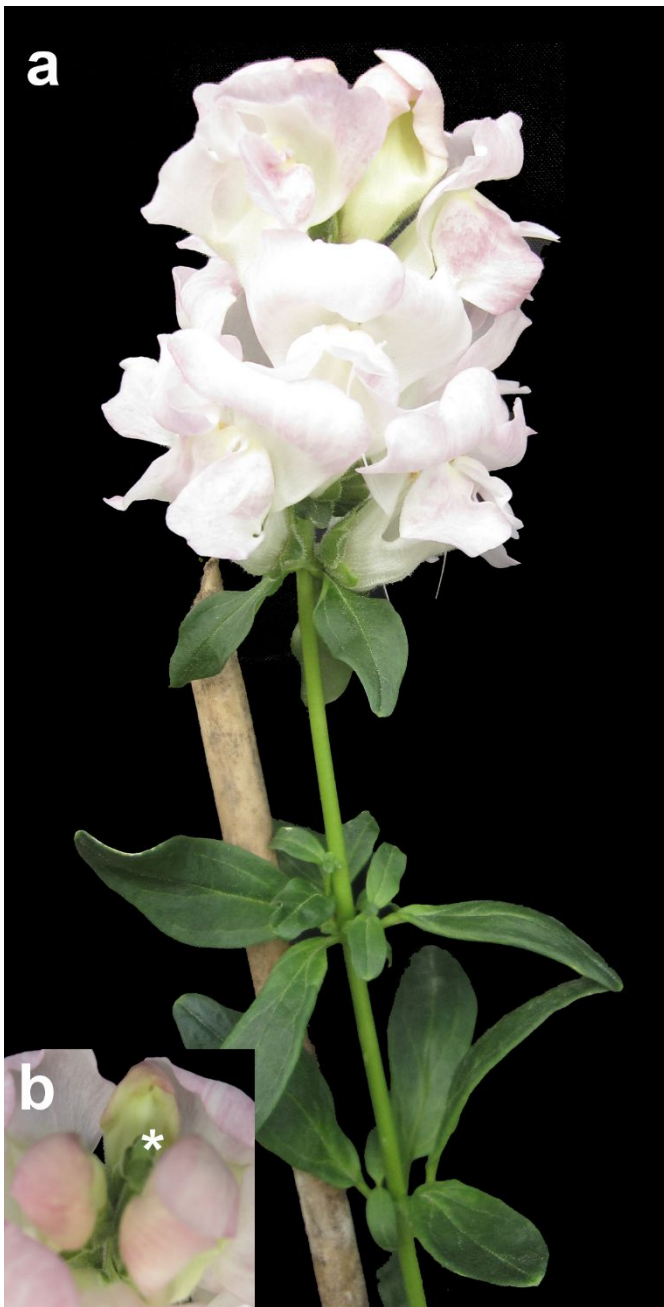

(a) The Antirrhinum wild type inflorescence is an indeterminate raceme.

(b) The flowers are disposed according to a spiral phyllotaxy starting from the SAM (asterisk).

**Figure S2. *ERAMOS* sequence.**

M L G S S F G S S S T P H E E E E N N P  
ATGTTGGGCAGCTCATTGGTTTCATCATCAACACCTCATGAAGAAGAGAAAATAATCCC

S P P N F Y D L H H H H H H H Q S F A S  
TCACCACCAATTTCTACGATCTCCACCACCACCACCACCACCAGAGCTTCGCCTCT

P P I H M R Q L L I S C A E L V A R S D  
CCACCAATCCACATGCGCCAGCTCCTCATCAGCTGTGCCGAGCTCGTTGCACGTTCCGAT

Y S A A H R L I A I L S S N A S P F G D  
TACTCTGCCGCACACCGTCTCATCGCCATCCTCTCCTCAAACGCTCGCCCTTCGGAGAC

S T E R L V H Q F T K A L T L R L N R A  
TCCACCGAGAGACTAGTCCACCAATTCACCAAAGCCCTAACCCCTCCGCCTCAACCGTGCC

S T A N T T S F M I P I I N P N T T T S  
TCCACCGCAAACACTACTTCTTCATGATCCCATAATCAATCCCAACACCACCACGAGT

A N E E A L L Q S S Y L S L N Q V T P F  
GCTAATGAAGAAGCCCTACTTCAGTCTCATACTTGTCACTAAACCAAGTCACACCCTTC

I R F S Q L T A N Q A I L E A I D G Q Q  
ATTAGGTTTAGCCAGCTCACCGCAACCAAGCGATACTCGAAGCGATCGACGGCCAACAA

A I H I L D F D I M H G V Q W P P L M Q  
GCCATCCACATACTCGATTTTCGACATCATGCACGGCGTGCAATGGCCGCGCTAATGCAG

A V A E R F P P P T  L R I T G T G K D I  
GCGGTAGCCGAGCGGTTCCCTCCCCCTACCCTCCGCATAACCGGCACTGGCAAAGACATT

E I L R K T G D R L T K F A H S L G L R  
GAAATCCTTCGAAAACCGGAGACCGTCTAACCAATTTGCCATTTCGTTAGGCCTAAGG

F Q F H P I T N Q D P V S I T S S V I L  
TTCCAATTCACCCATAACCAACCAAGACCCCGTCTCGATAACCTCCTCCGTTATCCTC

L P D E T L A V N C V H Y L H H L L N D  
CTCCCCGACGAAACCTAGCCGTAAACTGCGTGCATTATCTCCATCACTTGTTAAACGAC

R D R L R L F L H R I K A M N P R V F T  
CGAGATCGCCTCCGGTGTTCCTACACCGCATTAAGGCAATGAATCCTAGGGTTTTACG

V A E R E A N H N H P L F Q Q R F L E A  
GTCGCGGAGAGGAAGCAAACCAACCATCCCTTGTTCAGCAGCGGTTCCCTCGAGGCG

L D H Y A A V F D S L E A T L P P N S R  
CTTGATCATTACGCGCGGTGTTCGACTCGTTGGAGGCTACGTTACCGCCTAATAGCCGA

E R M A V E Q I W F G R E I A D I V A N  
GAGCGGATGGCGGTGGAGCAGATATGGTTTGGGAGAGAAATAGCGGATATTGTGGCGAAT

E G E N R R E R H E R F R S W E L V L R  
GAGGGTGAGAATAGAAGAGAAAGGCATGAGAGGTTTAGATCATGGGAGTTGGTTTTAAGA

N S G F G N V P L S T F A L S Q A K L L  
AATTCGGGTTTTGGGAATGTTCTTTGAGTACTTTTGCACTTTTCGCAAGCTAAGCTTTTG

L R L H Y P S E G Y Q L H V L Q D S C F  
TTGAGGCTTCATTATCCTTCTGAAGGGTATCAGCTTCATGTTCTTCAAGATTCTTGCTTT

L G W Q N Q P L F S V S S W H \*  
TTGGGATGGCAAATCAACCCCTTTTCTCGGTTTCTTCGTGGCACTGA

Nucleotide and protein sequence of *ERA* gene. Degenerate primers used to identify the first *ERA* fragment are underlined. Black triangle indicates the insertion point of the CACTA transposon in the *era* mutant.

**Figure S3. *ERAMOSA* expression pattern and its overexpression in *Arabidopsis thaliana*.**

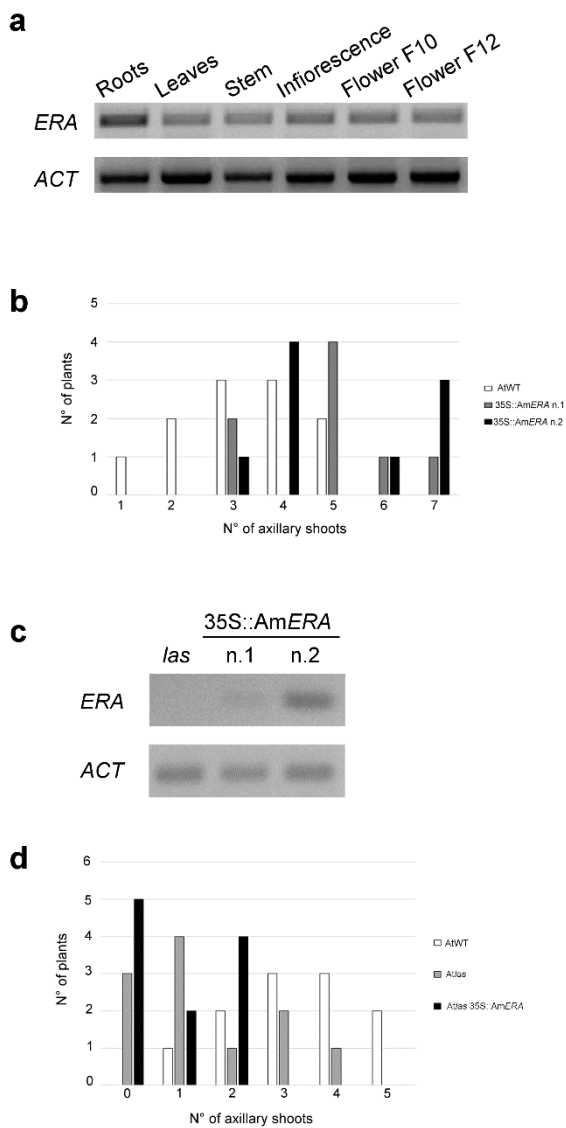

**(a)** The expression of *ERA* transcript analysed by semi-quantitative RT-PCR in duplicate using cDNA obtained from two different biological replicates of RNA (one of two identical results is shown). *ERA* is expressed in roots, leaves, stems and flowers at different stages of development (stages defined according to Vincent and Coen, 2004). As a control we amplified a fragment of an *ACTIN* gene.

**(b)** *ERA* overexpression in *Arabidopsis thaliana* Col-0 causes an increase in the number of secondary inflorescences formed at the axil of rosette leaves.

(c) The increase in lateral branching correlates with the overexpression of *ERA* transcript.

(d) *ERAMOSIA* overexpression in a *las* background is not enough to complement the *las* phenotype.

**Figure S4. Multi-fasta file of protein sequences used for the phylogenetic analysis.**

```
>OsGRAS-4 .
MRLVQLLVACAEAVACRD-----RA-QAAALLRE---L-QA----GAP-----VHGT-----A-FQRVASCFVQG-LADRLPL-AHPP-AL--
GPASMAF-----CIPPSSCAGR-----DGARGEALALA----YELCPYLRFHFVANACMLEAFE-----
-GESN-----VHVVDLG-MTLG-LDRGHQWRGLLDGLAARA-----SGK-----PA-----RVRVTGV-----
-----GAR-MDTMRAIGRELEAYAEGGLMY-LEFRG-INR-GLE-----SL-----HIDD-----
LGV--DAD-----EAVAINSVLELHSVV-----KESRG-----
ALNSVLQTIKRLSPRAFVLVEQDA-----GH-N-GPFFLGRFM-----EALHYAALFDAL-DA-A----LPRYDAR-----
RARVEQFHFGAEIRNVV-GC---EGA--A----R---VE-RHERADQ---WRRRMSR-AGFQSVPIK--MAAKAREWLDENAGGGG-----
YTVAEE-----KG-----CLVLGWKPKVIAASCW
>OsGRAS-5 .
RRWRRAKTACRR-----QR-----CRPARR-----A-FQRVASFFVQELLDRRASAGAGP-----
-----
CEHG-----VLH-----PA-----VVVR-----
-----EAYAEGGLMY-LEFRG-INR-GLE-----SL-----HIDD-----LGV-
-DAD-----EAVAINSVLELHSVV-----KESRG-----
ALNSVLQTIKRLSPRAFVLVEQDA-----GH-N-APFFLGRFM-----EALHYAALFDAL-DA-A----LPRYDAR-----
RARVEQFHFGAEIRNVV-GC---EGA--A----R---VE-RHERADQ---WRRRMSR-AGFQSVPIK--MAAKAREWLDENAGGDG-----
YTVADEKV-----CLVLGWKPKVIAASCW
>PaquLs .
-----MERVVTHFVDS-LAARVVQ-----
-----LXETQAASQLTAEQWLP-----HNLTDTELOGA-YLSLNQVTPFIRFTHLTANQAILEALQ-----
EWDA-----VHIVDME-IMQG---VQWPPMQALAGRA-----GGP-----P-----KIRISGV-----
-----GSA-LSLLEQTGNRLTTFAASLGLPMFEFHP-----
-----LHAAK-----
-----N-----DVV-----
-----E-----
-----
>SmLs1 .
--LRELLVECAAAVTSSD-----WH-RAIRCLVH---L-SR---AAS-----PHGD-----A-VERLAFYFSAA-LARCLCS-L-----
---SA-PCASEIRSLRLNLL-HFLEEDQPPPSFEDDLFY-----SGGAEAA-YLALNQVTPFIRFSHLSANQAILEAVD-----
NERA-----VHIVDLG-IMQG---LQWPPMQAL-----PPTLSSSSSSSTTLTIRITGT-----
-----GPS-ISLLEQTGARLRDFARTLHLD-FEFDA-VCT-TSR-----HV-VA-----S-LQ--QHLEL-
-RRG-----EALVNCMTQLHKL-----PAAHRA-----
ALPHALEFMRSICPRILTVAEKES-----EH-DLSQSFLERFL-----VTLDHAAVFDL-EA-T---LPPRSFQ-----
RLMIERLVLAKEISGIV-LE---DGG--GDDENLAVV---RHQSFGN---WRRDMEA-AGFQVPPSDFAIQAQAKLLLRHYPADG-----
YRL---LVENQ-HG-----SLFSLWHDKPLVALSTW
>SmLs2 .
--LRELLVECAASVTSSD-----WH-RAIRCLVH---L-SR---AAS-----PHGD-----A-VERLAFYFSAA-LARCLCS-L-----
---ST-PCASEIRSLRLNLL-HFLEEDQPPPSFEDDLFY-----SGGAEAA-YLALNQVTPFIRFSHLSANQAILEAVD-----
NERA-----VHIVDLG-IMQG---LQWPPMQAL-----PPTLSSSSSSSTTLTIRITGT-----
-----GPS-ISLLEQTGARLRDFARTLHLD-FEFDA-VCT-TSR-----HV-VA-----S-LQ--QHLEL-
-RRG-----EALVNCMTQLHKL-----PAAHRA-----
ALPHALEFMRSICPRILTVAEKES-----EH-DLSQSFLERFL-----VTLDHVAVFDL-EA-T---LPPRSFQ-----
RLMIERLVLAKEISGIV-LE---DGG--GDDENLAVV---RHQSFGN---WRRDMEA-AGFQVPPSDFAIQAQAKLLLRHYPADG-----
YRL---LVENQ-HG-----SLFSLWHDKPLVALSTW
>AtriLs .
QQLRQLLMTCAEHSRSD-----LQ-SAARILSL---L-SS---NSS-----PYGD-----S-TDRLVSQFVAA-LSLHLRL-----
PLPQQQQ-QS-----PRHIPPSLVTP-----QTVESS-FLSLNQITPFIRFSHLTANQAIILDALD-----
HN-S-----VHIVDLN-TMQG---VQWPPFMQAMAEF-----PHH-----GA-----TIRITGT-----
-----GPD-LSNLHRTGARLSRFAQTLGLD-FHFHP-F-L-----SNSLSDLLL-----LP-----Q-A-----
IASVAQPN-----EALAVNCVHHLVHL-----GHD-----
LPSLLRALKGNLNRVLTLSEREA-----GH-N-HPSFTERFS-----EALSHYSALFESL-EA-T---VPPSSRE-----
RMAVEQVWFGREITRVL-AN---EEEI-G---RRERERE-RHERFER---WAEMMRV-CGFEVVLSDFAVSQLRLLLRHYPSEG-----
YNL-----HLH-HD-----ACFLGWQNHPLFSVSSW
>PaLs .
AHLRNLTECAEYVGQCA-----WQ-RADRMISI---L-ST---RAS-----TRGD-----S-TERLVAQFTQA-LKIRSDL-AI-----
ARPPPQ-----PAGATE-----REIESA-YLCLNQVTPFIRFAHLTANQAILEALDT-----
DSPS-----IHVDIN-IMQG---VQWPPFMQALERP-----AGP-----PG-----HIRLTGA-----A-----IST-
-----GTD-AEALRRTGRRLERFAHTLGLR-FEFNP-WIL-----DDDISSL-----A-----IST-
-RPG-----ESLAINCVLHLLHELL-----DEAHN-----
EKLKSLVLRIRSLPKVVALAEREA-----DH-N-RPGFADRFA-----EALNHYSALFESL-EA-T---LPPRSQE-----
RLDVEQVWFGREITRVL-AL---EGH--G---R---SE-RHQRFER---WTEIMNE-CGFTSLSLSEFALSQARLLLRHYPSEG-----
YQL-----HSR-NN-----AAFLGWQNTPLFSVSSW
>AcLs .
AQMRRLLITCADFLSQSN-----FS-AAHRLVSF---L-SS---TSS-----PHGD-----S-TERLVHQFVRA-LTIRLNR-AS-----
---AS-MISSTTPSLSSCVPHFLPPASVASSSTSSGLTLELEVVEEEALLHHQLQSS-FICLNQVTPFIRFSHLTANQAILEAIE-----
GQES-----IHILDFDTIMQG---VQWPPMQAIAER-----SNP-----PN-----MIRITGI-----
-----GYD-LETLARTQRLENFAKSLGLR-FHFHP-LLL-L-----DSTSVL-----QL--S-----S-S-----ITL-
-LQE-----ETLVNVCVLYLHRLNRND-----DDYE-----
VRLFLHTIKAMNPKVVTLAEREA-----NL-N-NPLFSQRFL-----EALDHYTALFDSM-EA-T---LPPNTE-----
RLAIEQVWLGREIVDVV-SA---EGE--E---R---KE-RYERFQN---WAEKMRM-SGFSNVPLSPFAVAQAKLLLRHYPSEG-----
YQL-----HIL-ND-----SLFLGWQNHALFSVSSW
>VvLs .
```

IQMRQLLISCAELVSQSD----FS-AARRLLSI---L-SS----NSS-----PFGD-----S-TERLVHQFSAA-LSLRLSR-----  
 -----YATPATSSGAM----SASANTAAADSEAFHST-YLSLNQITPFIRFSQLTANQAILEAIE-----  
 GQRA-----IHILDFD-IMHG----VQWPPLMQAIAER-----CGN--LHP-----PP-----MLRITGT-----  
 -----GED-LGILQRTGDRLLKFAQSLGLK-FQFHP-LLL-----RNDPTSVPL-----YL--P-----S-A-----LQL-  
 -LPD-----ETLAVNCVLYLHRL--KD-----DSRD-----  
 LRLFLHKIKAMEPKVVTIAEREA-----NH-N-HPLFLQRFV-----EALDHYTAVFDSL-EA-T---LPPTSRE-----  
 RLAVEQIWFGREIVDIV-SA---EGD--N-----R---RE-RHERFES---WEVMLRS-SGFSNVPLSPFALSQAKLLLRHYPSEG-----  
 YRL-----QII-ND-----SFFLGWQNALFSVSSW  
 >TcLs .  
 THMRQLLISCAELVSQSD----FP-AANRLLSI---L-SS----NSC-----LYGD-----S-TERLVHQFTKA-LSLRINR-LH-----  
 ---GP-GSLMMMN-INYPIA-----AATATATAIANY--D-----IDPSLQSC-YLSLNQITPFIRFAHLTANQAILEAIV-----  
 GQQS-----IHILDFD-IMHG----VQWPPLMQALAER---SANT-LHP-----PP-----MLRITGT-----  
 -----GHD-LNILQRTGDRLLKFAQSLGLR-FQFHP-LLV-L-----NNDPTSVL-----NL--P-----S-T-----LTI-  
 -LPD-----EALAVNCMFLYHRL--KD-----DSRD-----  
 LRLFLHNKAMNPAVVTIAEREA-----NH-N-HPLFLQRFI-----EALDYYTAIFDSL-EA-T---LPPNSRE-----  
 RLAVEQIWFGREIVDIV-AA---EGE--N-----R---RE-RHERLET---WEVILRS-TGFSNVPLSPFAHSQAKLLLRHYPSEG-----  
 YRL-----QIL-NN-----SFFLGWQNRALFSVSSW  
 >GrLs .  
 LKMRQLLISCAELVSQSD----FP-AAIRLLSI---L-SS----SSS-----PSGD-----S-IERIVYQFVRA-LSLRINR-LHH-----  
 HHHHGLAG-SSLMRMNDISFPI-----TSTAGPV-NY--D-----IDPSLQSC-YLSLNQITPFIRFAHLTANQAILEAIV-----  
 GQQC-----IHILDFD-IMQG----VQWPPLMQALAER---SANT-HHP-----PP-----MLRITGT-----  
 -----GHD-LNILHRTGDRLLKFAQSLGLR-FEFHP-LLV-L-----NEDPTWIAT-----NF--T-----S-M-----VTI-  
 -LPD-----EALAVNCMLYLQRL--KD-----DSRD-----  
 IRLFLHHMKALNPTVVTVAEREA-----NH-N-HPLFLQRFV-----EALDYYTAIFDSL-EA-T---LPPNSRE-----  
 RLAVEQIWFGREIVDIV-AA---EGE--N-----R---RE-RHERLET---WEVILRS-SGFINVPLSPFAHSQAKLLLRHYPSEG-----  
 YQL-----QIV-NN-----CFFLGWQNRPLFSVSSW  
 >MeLs1 .  
 IHMRQLLITCAELISQSD----FS-AAHRLISV---L-SS----GSS-----PYGD-----S-RERLVHQFVKA-LSLRLNP-----H---  
 ---AA-AISCALMNIGNTTLS-VGAAG-GASSAATGDA--NV--GSLISREY-EEALQSC-YLSLNQITPFIRFSLTANQAILEAIEV-----  
 GQQA-----IHILDFD-IMHG----VQWPPLMQALAER---SSNN-LSP-----PP-----VLRITGT-----  
 -----GHD-LNILHRTGDRLLKFAQSLGLK-FQFHP-LLV-S-----NNDPSSL-----P-----S-A-----ITL-  
 -LPD-----EVLAVNCVHYLHRL--KN-----DSRD-----  
 LRIFLHRKALNPKVVTIAEREA-----NH-N-HPFFFQRFI-----EALDHYTAIFDSL-EA-T---LPPNSRE-----  
 RLAVEQIWFGREIMDIV-AA---EGE--D-----R---RE-RHERFES---WEMMLRS-TGFTNVPLSPFALSQAKLLLRHYPSEG-----  
 YHL-----QIL-SN-----SFFLGWQNHALFSVSSW  
 >MeLs2 .  
 IHMRQLLITCAELISQSD----FS-AAHRLISV---L-SA----SSS-----PYGD-----S-RERLVHQFVKA-LSLRLNP-----H---  
 ---GN-AMATVLMNITNLPSS-GGGGIGSASTATVSAI-NV--GSLFTRE--SEALQSC-YLSLNQITPFIRFSLTANQAILEAIEV-----  
 GQRA-----IHILDFD-IMHG----VQWPPLMQALAER---SSNT-LYP-----PP-----ALRITGT-----  
 -----GHD-LNLTNRTGDRLLKFAQSLGLK-FQFHP-LLL-L-----NTDPSSL-----P-----F-A-----ITL-  
 -LPD-----EALAVNCVLYLHRL--KD-----DSRG-----  
 LRIFLNRIKALNPKVVTIAEREA-----NH-N-HPFFFQRFI-----EALDHYTALFDSL-EA-T---LPPNSRE-----  
 RLAVEQIWFGREIMNIV-AA---DGE--D-----R---RE-RHERFES---WEMMLRS-TGFTNVPLSPFALSQAKLLLRHYPSEG-----  
 YHI-----EIV-NN-----SFFLGWQSHSLFSVSSW  
 >PtLs1 .  
 FHTRQLLVSCADLISQSD----FS-AAQRLLSH---L-LST--YNS-----PYGD-----S-TERLVHQFVRA-LSLRLN-----H---  
 RHPARST-TTAPLVFNMNISAPP-----PPPCPTTNTNNTN--RMVISYESMDQDTLQSC-YLSLNQITPFIRFSLTANQAILEAIV-----  
 GQQA-----IHILDFD-IMHG----VQWPPLMQALADR---SNNT-LHP-----PP-----MLRITGT-----  
 -----GHD-LSILHRTGDRLLKFAHSLGLR-FQFHP-LLL-L-----NNDPASLAL-----YL--S-----S-A-----ITL-  
 -LPD-----EALAVNCVLYLHRL--MD-----DSRE-----  
 LLLLHKIKALNPNVVTVAEREA-----NH-N-HLLFLQRFI-----EALDHYTALFDSL-EA-T---LPPNSKE-----  
 RLSVEQIWFGREIMDIV-AA---EGE--G-----R---RE-RHQRFET---WEMMLKS-SGFSNVPLSPFALSQAKLLLRHYPSEG-----  
 YQL-----QIV-NN-----SFFLGWQNHSLFSVSSW  
 >PtLs2 .  
 FQLRQLLVTCADLITQSD----YS-AAKRLLSI---L-SS----NSS-----PYGD-----S-IERLVYQFVRA-LSLRLDR-----  
 HGIP-T-APAPHVFNINNVH-----TSPPCGT-----NN--KMLNSYDS-DQETLRSC-YLSLNQITPFIRFSLTANQAILEAVQG-----  
 GQQA-----IHILDFD-IMHG----VQWPPLMQALADR---PNNT-LHP-----PP-----MLRITGT-----  
 -----GHD-LNILHRTGDRLLKFAQSLGLR-FQFHP-LLL-L-----NNDPTTLAL-----YL--P-----S-A-----ITL-  
 -LPD-----EALAVNCVLYLHRL--KD-----DSRE-----  
 LLLFLHKIKALNPKVVTVAEREA-----NH-N-QPLFLQRFI-----EALDHYKALFDSL-EA-T---LPPNNRE-----  
 RLAVEQIWFGREILDIV-AA---EGE--G-----R---RE-RHQRFET---WEMMLKS-VGFNKVPLSPFALSQAKLLLRHYPSEG-----  
 YQL-----QIL-KN-----SFFLGWQNHSLFSISSW  
 >PtLs3 .  
 FHMRQLLVSCADLISQSD----YS-AAKRFFSI---L-SS----NSS-----PYGD-----S-TERLVHQFIRA-LSLRLN-----H---  
 GHGIST-ST-APAAHVFNINNMV-----TSRPCGT-----ND--KMLISYEA-DQETLRSC-YLSLNKITPFIRFCHLTANQAILEAIV-----  
 GQQA-----IHILDFD-IMHG----VQWPPLMQALAER---SNNT-LHP-----PP-----MLRITGT-----  
 -----GHD-LNVLHRTGDRLLKFAQSLGLR-FHFHP-LLL-L-----NNDPTSLAH-----YL--P-----S-A-----ITL-  
 -LPD-----EALAVNCVSYLHRL--KD-----DSRE-----  
 LLLFLHKIKALNPKVVTVAEREA-----NH-N-HPLFLQRFI-----EALDHYTALFDSL-EA-T---LPPNSRE-----  
 RLAVEQIWFGREIMDIV-AA---EGE--G-----R---RE-RHQRFET---WEMMLKS-VGFIKVPPLSPFALSQAKLLLRHYPSEG-----  
 YQL-----QIL-NN-----SFFLGWRNHSLSVSSW  
 >CsiLs .  
 IHMRQLLISCAELFSQAD----FS-AAHRLISI---L-SA----NSS-----PYGD-----S-IERLVHQFIRA-LSLRLN-----LH---  
 ---HA-NAFLMMNITTT-----TTTATLTPY-NT--TYNDRN-----ALQSC-YLSLNQITPFIRFSLTANQAILESQV-----  
 GQQS-----IHILDFD-IMHG----VQWPPLMQALVERF--KNSNM-LQP-----PP-----MLRITGT-----  
 -----GND-IEILQRTGERLLKFAQSLGLR-FQFHP-LLL-M-----NDDPTSAF-----YL--P-----S-A-----LTI-  
 -LPD-----ETLAVNCMLFLHKL--KD-----HDTRD-----  
 LRLFLHKIKALNPRVVTIAEREA-----SH-N-HPLFLQRFV-----EAVDHYGAI FDSL-EA-T---LPPNSRE-----



RLAVEQVWFGREIVEIV-AT---EGE--N---R---KE-RHERFDS---WEMILRS-CGYSNVPLSGYALSQAKLLLRHYPSEG-----  
YQL-----QVL-NN-----SLFLGWQNRALFSVSSW  
>CcLs .  
IHMRQLLISCAELFSQSD----FS-AAHLRISI---L-SA---SSS-----PYGD-----S-IERLVHQFIRA-LSLRLN-----LH-  
---HA-NATLLMMNITT-----TTTATLPY--NT--TTYNDRN-----ALQSC-YLSLNQITPFIRFSLHTANQAILESLQV-----  
GQOS-----IHILDFD-IMHG---VQWPPLMQALVERF--KNSNM-LQP-----PP-----MLRITGT-----  
-----GND-IEILQRTGERLLKFAQSLGLR-FQFHP-LLL-M-----NDDPTSAF-----YL--P-----S-A-----LTI-  
-LPD-----ETLAVNCMLFLHKLK--KD-----HDTRD-----  
LRLFLHKIKALNPRVVTIAEREA-----SH-N-HPLFLQRFV-----EAVDHYGAI FDSL-EA-T---LPPNSRE-----  
RLAVEQVWFGREIVEIV-AT---EGE--N---R---KE-RHERFDS---WEMILRS-CGYSNVPLSGYALSQAKLLLRHYPSEG-----  
YQL-----QVL-NN-----SLFLGWQNRALFSVSSW  
>CpLs .  
IHMRQLLITCAELLSRSD----FP-AAQRLLSF---L-SA---NSS-----PYGD-----S-TERLVHQFARA-LSMRITS-----HH-  
---GS-GSVLMLNLNL-----NDAALPTPVINS--SLEEDRYS---STSQSC-YLSLNQITPFIRFSLHTANQAILEAIEV-----  
GQQA-----IHILDLD-IMQG---VQWPPLMQALAEER--SHNS-LNP-----PP-----MLRITAT-----  
-----GHD-LNMLNTTGERLFRFAQSLGIR-FSFHP-LLV-L-----NDDPASLAL-----FL-IP-----S-A-----LAI-  
-LPD-----ESLAVNCVLYLHRLI--KD-----DDSRG-----  
LRLLLQKIKALNPTVVTVAEREG-----NH-N-HPLFLQRFV-----DALDHYTAIFQSL-EA-T---LPPNSRE-----  
RLGVEQIWFGREIVDIV-TA---QE--N---R---RE-RHERFEW---WEMMRG-AGFSNVALSPFALSQAKLLLRHYPSEG-----  
YKL-----QIL-NN-----SFFLGWHNRRLFFVSSW  
>StLs .  
IQIRQLLISCAELISRSD----FS-AAKRLITI---L-ST---NSS-----PFGD-----S-TERLVHQFTRA-LSLRLNR-YI-----  
---SS-TTNHFMTPVET-----TPTDSSSSL-----PSSLALIQSS-YLSLNQVTPFIRFTQLTANQAILEAING-----  
NHQA-----IHIVDFD-INHG---VQWPPLMQALADR-----YP-----AP-----TLRITGT-----  
-----GND-LDTLRRTGDRLAKFAHSLGLR-FQFHP-LYI-ANN-NR--DHDEDP-SI-----I-----S-S-----IVL-  
-LPD-----ETLAINCVFYLHRLK--KD-----REK-----  
LRIFLHRVKSMPKIIVTIAEKEA-----NH-N-HPLFLQRFI-----EALDYITAVFDSL-EA-T---LPPGSRE-----  
RMTVEQVWFGREIVDIV-AM---EGD--K---R---KE-RHERFRS---WEVMLRS-CGFSNVALSPFALSQAKLLLRHYPSEG-----  
YQL-----GVS-SN-----SFFLGWQNPPLFSISSW  
>SlLs .  
IQIRQLLISCAELISQSD----FS-AAKRLITI---L-ST---NSS-----PFGD-----S-TERLVHQFTRA-LSLRLNR-YI-----  
---SS-TTNHFMTPVET-----TPTDSSS-----SSSLALIQSS-YLSLNQVTPFIRFTQLTANQAILEAING-----  
NHQA-----IHIVDFD-INHG---VQWPPLMQALADR-----YP-----AP-----TLRITGT-----  
-----GND-LDTLRRTGDRLAKFAHSLGLR-FQFHP-LYI-ANN-NH--DHDEDP-SI-----I-----S-S-----IVL-  
-LPD-----ETLAINCVFYLHRLK--KD-----REK-----  
LRIFLHRVKSMPKIIVTIAEKEA-----NH-N-HPLFLQRFI-----EALDYITAVFDSL-EA-T---LPPGSRE-----  
RMTVEQVWFGREIVDIV-AM---EGD--K---R---KE-RHERFRS---WEVMLRS-CGFSNVALSPFALSQAKLLLRHYPSEG-----  
YQL-----GVS-SN-----SFFLGWQNPPLFSISSW  
>MgLs .  
LQMRQLLISCAELISRSD----LS-AAHLRISI---L-SS---NSS-----PYGD-----S-TERLVHQFTRA-LSLRLTR-YT-----  
---TA-AAASTSI-----ISTTIA-----GRDDALVQSS-YLSLNQVTPYIRFSQLTANQAILEAIDG-----  
AHHA-----IHILDFD-IMHG---VQWPPLMQAVAER-----YP-----LP-----TLRITGT-----  
-----GSD-LEILRRTGDRLAKFAHSLGLR-FQFHP-LIL-L-----PGEDPISV-----A-----S-S-----VLL-  
-LPD-----ETLAVNCVHYLHRLK--RD-----RDR-----  
LALFLHRKIKAMSPRVVTVAEREA-----NH-N-HPIFQQRFL-----EAVDHYAAV FDSL-EA-T---LPPNSRE-----  
RLAVEQIWFGREIADIV-AA---EGE--S---R---RE-RHERFRS---WEVI-----  
TL-----HII-ND-----SFFLGWQNHPLFSVSSW  
>AmERA .  
IHMRQLLISCAELVARSD----YS-AAHLIAI---L-SS---NAS-----PFGD-----S-TERLVHQFKA-LTLRLNR-AA-----  
---TA-NTTFMIPIT-I-----NPNTTTS-----ANEALLQSS-YLSLNQVTPFIRFSQLTANQAILEAIDG-----  
QQA-----IHILDFD-IMHG---VQWPPLMQAVAER-----FP-----PP-----TLRITGT-----  
-----GKD-IEILRKTGDRLTFAHSLGLR-FQFHP-IT-----NQDPISI-----T-----S-S-----VIL-  
-LPD-----ETLAVNCVHYLHLL--ND-----RDR-----  
LRLFLHRKIKAMNPRVVTVAEREA-----NH-N-HPLFQQRFL-----EALDHYAAV FDSL-EA-T---LPPNSRE-----  
RMAVEQIWFGREIADIV-AN---EGE--N---R---KE-RHERFRS---WELVLRN-SGFGNVPLSTFALSQAKLLLRHYPSEG-----  
YQL-----HVL-QD-----SCFLGWQNPPLFSVSSW  
>EgLs .  
INTRQLLVTCAEILLSN----FA-PAHLRISI---L-SA---NSS-----PYGD-----S-TERLVHQFSRA-LSIRLHR-----  
---SA-VAAAAPPNRSSLLFP-----HRSNSSTVFGFGVD--SAVRPGQSDPSALQSC-YLTLNQVTPFIRFSLHTANQAILEAID-----  
GQRA-----VHIVDLD-IMHG---VQWPPLMQAIVERSTNDKNA-LLL-----PP-----TLRITGA-----  
-----GHD-LEALHRTGDRLSTFAQSLGLE-FQFCP-LLL-----PHDALSVAL-----HAAIP-----S-E-----IST-  
-LPD-----EALAVNCVLC LHRLL--KD-----DARE-----  
LSIFLRKIKALRPRVVTVAEREA-----SH-N-HPMFLQRFV-----EALDHYTAVFDSL-EA-T---LPPSSRE-----  
RLALEQAWFGREIADII-GE---EGE--G---R---LE-RHERFES---WEVLLRS-SGFGNVPLSPFALSQAKLLLRHYPSEG-----  
YQL-----QVK-NS-----SVFLGWQSRALFTVSSW  
>PpLs .  
---MRQLLITCAELISQLD----FS-SARRLISL---L-SS---KSS-----PFGD-----S-TERLTHQFVKA-LSLRLN-----  
NPNSS-S-----AALT-----AATAAASSSSNYL--LLEEDDNNNEALHSC-YLTLNQITPFIRFSLHTANQAILEAIDS-----  
SHHS-----IHILDFD-IMHG---VQWPPLMQALTDRS-YNSDRTVQHP-----PP-----MLRITAT-----  
-----GHS-LALLLKTGDRLLKFA NSLGLA-FHFHP-LVL-NDA--VQ---PSDIIS-----P-----S-T-----LGL-  
-LPN-----EALAVNCVLYLHTLV--TD-----DSRE-----  
LSLFLRKIKSLNPKVLTIANKEA-----NH-N-HPLFFNRFV-----EALHYGAVFDSL-EA-T---LPPNSRE-----  
RQAVEDVWVGREIRDVV-GA---EEG--R---R---RQ-RHEKYETY--WEVMLRR-AGFENVALSPFALSQAKLLLRHYPSEG-----  
YQL-----RII-ND-----SFFLGWQNRPLFSVSSW  
>MdLs1 .  
THLRLLITCAELISHLD----FP-SANRLISL---L-SS---NSS-----PXGD-----S-TERLTHYFVKA-LSFLRLN-----  
NPNYSX-TTICPM TALTT-----AASASASSSSNYLFPMLLEEDD-NEETLHSC-YLTLNQITPFIRFSLHTANQAILEIDS-----  
SHLS-----IHILDFD-IMHG---VQWPPLMQALVERS-YNSP--LHP-----PP-----TLRITAT-----

```

-----GRD-LTLLRRTGERLLRFAQSLGLA-FQFHP-LVL-NNA--AR---PSDLIS-----P-----S-T----LGL-
-HQN----EALAVNCVLYLHTLV--TD-----NH-N-NPLFFNRFV-----EALDHYGAVFESL-EA-T---LPPNSRE-----RLAVEE-
LLLFLQKIKSLNPKVFTVANKEA-----VQWPPLMQALVERS-YNSP---LHP-----PP-----TLRITAT-----
WXGREVKDGV-GV---EGE--K---R---KQ-RHERYETF---WEVVLRR-AGFENVALSPFALSQAKLLRLHYPSEG-----YQL-----
RIL-ND-----SFFLGWQNRPLFSVSSW
>MdLs2 .
THLRLLITCAELISHLD-----FP-SAHRLISL---L-SS---NSS-----PFGD-----S-TERLTHHFVKA-LCFRLNT-----
NPNYSP-TTIGPLTALTN-----AASASASSSSNYLFLPVLQEEEDNNEEALHSC-YLTNLNQTTPFIRFSLHTANQAILEAIDA-----
SHLS-----IHILDFD-IMHG---VQWPPLMQALVERS-YNSP---LHP-----PP-----TLRITAT-----
-----GRD-LSLLLRTGERLLRFAQSLGLA-FQFHP-LVL-NNT--SP---PSDLIS-----P-----S-T----LGL-
-HQN----EVLAVNCVLYLHTLV--TD-----NH-N-NHLFFNRFV-----EALDHYGAVFDSL-EA-T---LPPNSRE-----RLVVEE-
LFLFLQKIKSLNPKVFTIANKEA-----NH-N-NHLFFNRFV-----EALDHYGAVFDSL-EA-T---LPPNSRE-----RLVVEE-
WFGREIKDGV-GV---EGE--K---R---KQ-RHESYETF---WEVVLRR-VGFENVPLSPFALSQAKLLRLHYPSEG-----YQL-----
RMF-ND-----SFFLGWQNRPLFSVSSW
>FvLs .
--ARQLLIRCAELISQLD----FS-SAHGLISI---LASS---NYS-----PHGD-----S-TERLVHQFVRA-LSLRL-----
PPVAAA-PPDMARVAAAT-----GTSAASTSSA-----LSLEVTEAEEETLQSC-YLTNLNQTTPFIRFSLHTANQAILEAIDS-----
SHHA-----IHILDFD-IKHG---VQWPPLMQALVERS-YGSS---SSP-----PP-----LLRITAT-----
-----GRD-LTLLRRTGERLLRFAQSLGLT-FHFRP-IVL-LND--VA---MIDYLN-----P-----A-S-----LGL-
-FPN----EALAVNCVLYLHRL--TD-----DARD-----
LHLFLDKIRALNPKIVTVAEREA-----NH-N-SPMFLNRFV-----EAVDHYGAVFGSL-EA-T---LPPNSRE-----
RLAVEQVMWFGREIADV-AA---DDD--QG---R---KQLRHERYEN---WEMMMRR-SGFSNVPLSPFALSQAKLLRLHYPSEG-----
YQL-----HSL-KD-----SFFLGWMMNRPLFSVSSW
>CsLs .
LQMRQLLIRCAHFISQSD----FI-SAHLLSI---L-SS---NSS-----PYGD-----S-TQRLHYFSSS-LSHLL-----
-----PSSNYNSFFHH-----HHDIKIQSC-YLSLNQITPFIRFSLHTANQAILEGIE-----
ESGM-----IHVLDFD-IMHG---VQWPPLMQALADR-----FP-----SP-----MLRITAT-----
-----GVD-LNFLHKTGDRLSKFAQSLGLR-FQFHP-LLL-L-----HDRDHRV-----IP-----A-A-----LTL-
-FPD----EALAVNCVLYLHRLM--KD-----D-----
VRVLLNKIKALNPKVVTIAEKEA-----NF-N-HPLFMQRFV-----EALNHYTLFDSL-EA-T---LPPNSRE-----
RLAVEQVWFGREINDIV-SG---EVN--K---K---KQHYAERYES---WETMLKS-LGFSNIPLSPFALSQAKLLRLHYPSEG-----
YHL-----QIL-HD-----SLFLGWQNPPLFSVSSW
>RcLs .
IYMRQLLISCAELISQSD----FS-AAHRLISV---L-SS---SSS-----PYGD-----S-RER-----
-----
-----
-----
-----S-AGFNNVPLSPYALSQAKLLRLHYPSEG-----YHL-----QMI-ND-----
SFFLGWQNRALFSVSSW
>MaLs1 .
IHARQLLISCADLVHRGD----LP-AADRAISI---L-SA---AAS-----PCGD-----S-TERLIRQFCRA-LSVRVGR-V-----
-----SPSAESL-----GSLRSS-YLSFNQISPFIRFSLHTPNQAILEA-----
-----AIAERSD-----PSD-----PP-----FIRITGT-----
-----GSN-LEVLRRTGHRQLQNFASLGLG-FQFHP-LLL-----HPTSTSL-----NF-TP-----S-P-----FRL--
HPG-----ETLVVNCVLFHLKQ--KE-----GGNEDGSRD-----
LQAFRLTIRAMNPSVVTVAEREA-----SH-N-SPNFMQRFV-----EALDYYMAVFESL-EA-T---LPPTSQE-----
RLAVEQVWLQGBIEGIV-GG---EGG--G-----HE-RSER-----WENVLRD-AGFSSVQLSNFAVSQARLLRLHYPSEG-----
YQV-----ELV-RD-----SLFLGWQNRHLFSVSSW
>MaLs2 .
VNARQLLISCAELVHCGD----LP-AAERAISI---L-TA---AAA-----PYGD-----S-IDRLIRQFCRA-LSVRIGR-V-----
-----SPSAASL-----GSLQSS-YLLFNQMTPLRFSHTANQAILEA-----
-----AIADRSD-----PGD-----PP-----FIRISGT-----
-----GSS-LETLQRTGDRLRNFAHSLGLE-FQFHP-LLL-P-----PSVHSTNTSY-----NF-TP-----S-C-----LQF--
HPS-----ETLVVNCVLFHLKQ--RE-----DGNDDGSRK-----
LQAFRLTIRVMNPSVVTVAERET-----VH-S-SRSFMQRFV-----EALDYYTAVFEAL-EA-T---LPPTSEE-----
RMAVEQVWLGREIESIV-GG---EGD--G---R---RE-RHER-----WDSLMRD-AGFSSLAPSTFAVSQARLLRLHYPSEG-----
YQL-----QLV-RD-----SFLLGWHSRHLFSVSSW
>MaLs3 .
AHARQLLISCAELAHRGD----LP-AAQTASL---L-LA---TAS-----PYGD-----S-TDRLVHQFARA-LSLRVER-----
-----LLPPVDAAS-----PEALQSS-YLSFNQITPFLRFAHLTANQAILEA-----
-----RSD-----PKD-----PP-----SIRVTGT-----
-----GSN-LEVLRRTGDRLQTFADSLNLH-FQFHP-LLL-PST-----SSNPLSSTA-----DL-TS-----S-S-----FQI--
HPG-----EILAVNCVLFHLKLL--KD-----GGSDGSDH-----
LRAFQAVRAMNPVVTVAEREA-----SH-N-SPIFLQRFV-----EALDYYTAVFESL-EA-T---LPPTSRE-----
RVAVEQVWLSKEIEDVV-SR---EGD--G---R---RE-RHERFEW---WEALMRD-AGFTNLPLSPFALSQARLLRLHYPSEG-----
YQL-----QMV-RD-----SFFLGWQKSLFSVSSW
>MaLs4 .
APVRQLLVSCAELVHRGD----LP-AARHTGSL---L-LA---TAS-----PYGD-----S-TDRLVHQFARA-LSLRVDP-----
-----LFPS-VDAAS-----PEALQSS-YLSFNQITPFLRFAHLTANQAILEA-----
-----RSD-----PNN-----PP-----SIRITGT-----
-----GRN-LDVLRRTGDRLQTFADSLGLG-FEFHA-LLF-PST-----TSDPSSSTTT-----DF-TS-----S-S-----LRL--
HPG-----EILTVNVCVLFHLNLL--QD-----GGSDDSRD-----
LRAFQAVRAMNPVVTVAEREA-----NH-N-APIFFQRFM-----EALDYYTAVFESL-EA-T---LPPTSRE-----
RAAVEQVWLGREIEDVV-AR---EGE--R---R---RE-RHERFDR---WETLMRG-AGFTNLPLSPFALSQARLLRLHYPSEG-----
YQL-----HTV-RD-----SFFLGWQNKPLFSVSSW
>PdLs1 .

```

TRSCQLLIGCAELIHRAD-----YS-AARRILSL---L-SN----ISS-----PHGD-----S-TDRLVHQFTRA-LSLHIDS-L-----TH-  
-----LLPPSFFSSN-----GDTLQSS-YLSLNKVTPLRFAHLTANQAI LEAVD-----  
GRQS-----IHILDFD-TSHG-----VQWPPPLQAI AERSE-----PSN-----RP-----SVRITGT-----  
-----GTD-LDVLHRTGDRLKAFASSLGLR-FQFHP-LHL-P-----TTNPDTSASF-----S-S-----FQP-  
-HPG-----ETLAVNCTFLFLHKL--RD-----RGSDDPACK-----  
LMGFLRAVKEMNPVAVTVAEREA-----NH-N-SPVFLQRFM-----EALDHYAAVFESL-EA-T----LPPKSRE-----  
RQEVEEMWLGREIEDIV-GK-----EGE--E-----R-----RE-RHERFEW-----WEALMRG-RGFSSQLQSPFALTOAKLLLRHYPSEG-----  
YQL-----IQMS-KN-----CLFLAWQHKPLFSVSSW  
>PdLs2 .  
THSCRLLI SCAELIHRAD-----YS-AARRILSL---L-SN----ISS-----PHGD-----S-TDRLVHQFARS-LSLRIDR-L-----TH-  
-----LISPSLFSDN-----EDTLQSS-YLSLNKVTPLRFAHLTANQAI LEAID-----  
GHR-----IHILDFD-TSHG-----VQWPPPLQAI AERSD-----PSS-----LP-----SIRITGT-----  
-----GTG-LDVLRRRTGERLQAFANSLGLR-FQFHP-LYL-P-----TADPDASASL-----N-----S-S-----FQL-  
-HPG-----ETLAVNCMLFLHKL--KD-----GSSDDPACK-----  
LVAFHLAVKAMNPVVVTVAEREA-----NH-N-SPIFLRRFM-----EALDHYTAVFESL-EA-T----LPPKSPE-----  
RLEVEQVWLGREIEDIV-GR-----EGE--G-----R-----KE-RHERFEW-----WEGLMRG-RGFSSPLSPFALSQAKLLLRHYPSEG-----  
YQL-----PMS-KN-----SLFLGWQHKPLFSVSSW  
>PdLs3 .  
AHARQLLISCAERI HCGD-----LP-TARRTASL---L-SA----AAS-----PYGD-----S-ADRLTHQFARA-LSLRIDS--P--SR--LA-  
-----SPSPSAASS-----SEALQSS-YLSLNQVTPPLRFAHLTANQAI LEALD-----  
GRR-----IHILDFD-TSHG-----VQWPPPLQAI AERSN-----ADG-----PP-----SRITGT-----  
-----GTD-LSVLRRTGDRLQTFAHSLGLQ-FQFHP-LL-PIS--ST--NSSPSSSTSTSI LSTTTTTTTLN-TS-----S-S-----FQL-  
-HPG-----ETLAVNCVFLHKL--QDQD-----SRSEDDGSR-----  
LRAFQLAVKALNPAAVTVAEREA-----SH-N-SPIFLQRFM-----EALDYITVVFESL-EA-T----LPPKSQE-----  
RLAVEQVWLGREIEDIV-AW-----EGE--G-----R-----RE-RHERFAR-----WEGLMRD-AGFSNPLSPFALSQAKLLLRHYPSEG-----  
YQL-----QMV-RD-----CIFLWQNKALFSVSSW  
>AtLAS .  
HHLRRLFTAANFVSQSN-----FT-AAQNLLSI---L-SL----NSS-----PHGD-----S-TERLVHLFTKA-LSVRINR-----  
QQQDQT-AE-TVATWTTNEMTM-----SNSTVFTSSVCKE--QFLFRTK-NNNSDFESCYYLWLNQLTPFIRFGHLTANQAI LDATET-----  
NDNGA-----LHILDLD- ISQG-----LQWPPMLQALAER-----SSNP-SSP-----PP-----SLRITGC-----  
-----GRD-VTGLNRTGDRLTRFADSLGLQ-FQFHT-LVI-V-----EEDLAGLLL-----QI-RL-----L-A-----  
LSA--VQG-----ETIAVNCVHFLHKIF--ND-----DGDM-----  
IGHFLSAIKSLNSRIVTMAEREA-----NH-G-DHSFLNRF-----EAVDHYMAIFDSL-EA-T----LPPNSRE-----  
RLTLEQRWFGKEILDV--AA-----EET--E-----R-----KQ-RHRRFEI-----WEEMKR-FGFVNPVIGSFALSQAKLLLRHYPSEG-----  
YNL-----QFL-NN-----SLFLGWQNRPLFSVSSW  
>EsLs .  
HHLRRLFTAADFVSQSN-----FS-AAQNLLSI---L-SA----NSS-----PYGD-----S-TERLVHLFSKA-LSIRINR-----  
QQQDPT-AE-NVATWTTNEMT-----SSTVFTSSVCKE--QFLFRTKNNNSDFESCYYLWLNQLTPFIRFGHLTANQAI LDATET-----  
NGDGA-----LHILDLD- ISQG-----LQWPPMLQALAER-----SSNP-NSP-----PP-----SLRITGC-----  
-----GRD-VTGLNRTGDRLTRFANSLGLQ-FQFHT-LVI-V-----EEDLAGLLL-----QI-RL-----L-A-----  
LSA--VQG-----ETIAVNCVHFLHRFS--ND-----DGDM-----  
IGHFLSAIKSLNPRIVTMAEREA-----NH-G-DHSFLNRFA-----EAVDHYVAIFDSL-EA-T----LPPNSRE-----  
RLTLEQRWFGKEILDV--AA-----KAE--E-----R-----KQ-RHRRFEI-----WEEIMKR-FGFVNPVIGSFAFSQA KLLLRHYPSEG-----  
YNL-----QFL-NN-----SLFLGWQNRPLFFVSSW  
>CrLs .  
HHLRRLFTAADFVSQSN-----FT-AARNLLSI---L-SL----NSS-----PYGD-----S-TQRLAHLFTKA-LSLRINR-----  
LQQEQDP-----TVATCTTNEMTM-----STNSTVFTSSVCKE--QFLFRTK-NNNSDFESCYYLWLNQLTPFIRFGHLTANQAI LDATET-----  
NDNGA-----LHILDLD- ISQG-----LQWPPMLQALAER-----SSSP-NSP-----PP-----SLRITGC-----  
-----GRD-VTGLNRTGDRLTRFANSLGLQ-FQFHK-LVI-V-----DEDLPGLLL-----QI-RL-----L-A-----  
LSA--VQG-----ETIAVNCVHFLYKFF--ND-----DADL-----  
IGHFLTVIKSLNPRIVTMAEREA-----NH-G-DHSFLIRFS-----EALDHYVAIFDSL-EA-T----LPPNSRE-----  
RLTLEQRWFGKEIMDV--AA-----EAT--E-----R-----KQ-RHRRFEI-----WGEMMKR-FGFVNPVIGSFALSQA KLLLRHYPSEG-----  
YNL-----QFL-ND-----SLFLGWQNRLLFSVSSW  
>LuLs1 .  
IQVRQLIVRCSDLISQAD-----YS-SAHLRIGI---L-SA----ASS-----PYGD-----S-TQRLAHHFSSA-LSLRLSG-----  
-----HLPIAVV-----DHREVASA-  
YLTLNQITPFIRFTHLTANQAI LESVLLGQQPDDQGT-----IHIVDFD-IMHG-----VQWPPMLQALAER-----HP-----  
PP-----SLRITGT-----GHD-PETLTRTGDRLSKFAQSLGLT-FQFHP-LL-LHA-----SAD-----  
-----HL-IP-----S-A-----VTV--LPG-----ETLAVNCMFYLHRLI--NDF-----  
-----QNDDYM-----IRTFLLRREMNPVVTIGEREM-----DS-----VGSGGGIGEAVEYYQRVLESLE-EE-T---  
-VAPTSAD-----RAEVEGVWFSKEIKEV-NG-----G-----R-----VDHKL RW-----WSEMMTS-  
VGFRNVGLSPFAVSQAKLLLRHYPSEG-----YRLDHE-DDDDGV-VS-----GLFLGWRDRPLFSLSW  
>LuLs2 .  
IQVRQLIVRCSDLISQAD-----YS-TAHCLIAI---L-SA----ASS-----PYGD-----S-TQRLAHHFSSA-LSLRLSR-----  
-----HPRPAAV-----DHRDVASA-  
YLTLNQITPFIRFTHLTANQAI LESVLLGQQPDDQGT-----IHIVDFD-IMHG-----VQWPPMLQALAER-----HP-----  
PP-----SLRITGT-----GHD-PETLTRTGDRLSKFAQSLGLT-FQFHP-LL-FHA-----SAD-----  
-----HL-IP-----S-A-----VTI--LPG-----ETLAVNCMFYLHRLI--NDF-----  
-----QNDDYM-----IRTFLLRRVREMNPVVTIGEREM-----D-----SGGGVGEVEYYQRVFESL-EE-T---  
-VAPTSVD-----RAEVEGVWFSKEIKEV-NG-----G-----R-----VDHKL RW-----WSEMMTS-  
VGFRNVGLSPFAVSQAKLLLRHYPSEG-----YRLDHD-DDVEGV-VS-----GLFLGWRDRPLFSLSW  
>PpatLs1 .  
MQLRDLLETAQLISQCD-----WD-RARPLLQ---L-SR----RVS-----TTGD-----S-SERVASCFFEA-LATFRSR-V-----  
-----SGIQINEL-----LPSRIQGSPNQE-----MISA-YLALNQVTPMRF AHLTANQAI LEALT-----  
GENF-----VHIVDLE-IGHG-----IQWPLFMQALADL-----RG-----EEGYTIQHLRITGV-----  
-----GQD-RDVLNRTGIRLAEFAQSINLP- FEFSP-LVQ-ISE-----HL-VP-----R-M-----LGL-  
-RVG-----EAVAINCMLQLHRL-----AKGPE-----  
KLISFLCMLESITPKVVTLAELEA-----SH-N-QPHFLDRFA-----EALNHYSTLFDLSDA-T----LPPTSAD-----

RIRVEQWCKMEIVNIV-AC----DGA--E-----RIV-----RHQRFEL----WRRYFHR-AGFQLLSTSRFATSQARLLLLRLHYPCDD-----  
YQL----LENVD-DG-----CLLLGWQDHPFCVSSW  
>PpatLs2 .  
MLLRDLIVDTAQYISQCD----WE-RARPLLQV---L-RR----QVS-----STGD-----S-SERVASCFEEA-LATFRSR-V-----  
-----SGTEINEL-----LSSPTQEPSSEE-----ILSA-FLALNQVTPFMRFAHLTANQALLEALT-----  
GEDF-----VHIVDLD-IGHG----VQWPPFMQALADI-----RG-----EEGHTIQHLRITGV-----  
-----GKD-REMLDRTGTRLAEFAQSIQLP-FEFTP-LVQ-APE-----NL-IP-----S-M-----FGL-  
-RIG----EAVAFNCMLQLHQLL-----AKGSE-----  
KLTSFLYMLESITPRVVTLAELEA-----SH-N-QPHFLDRFA-----EALNHYSTLFDSL-DA-T---LPPTSPE-----  
RIRVEQWTKYMEIINIV-AC---DGT--E-----RTV-----RHQRCEQ---WRRFFER-AGFQLLPTSRFATSQARLLLLRLHYPCDG-----  
YRL----VEDVE-DG-----CLLLGWQDRPLFCVSSW  
>OsMOC1 .  
PSTRDLLLLACADLLQRGD----LP-AARRAAEIV--L-AA----AAS-----PRGD-----A-ADRLAYHFARA-LALRVDAKAGHG-HV-----  
-----VVGGAARPASSGA-----YLAFNQIAPFLRFAHLTANQAI LEAVD-----  
GARR-----VHILDL-D-AVHG----VQWPPLLQAI AERAD----PALGP-----P-----EVVRTGA-----  
-----GAD-RDTLLRTGNRLRAFARSIHLP-FHFTP-LL-SCA-TTAPHHVAGTSTGAAA-----AA-----STAAAATGLEF-  
-HPD----ETLAVNCVMFLHNLG-HDE-----  
LAAFLKWKVAMPVAVTIAEREA-GGGGGGG--DHID---DLPRRV-----GVAMDHYSAVFEAL-EA-T---VPPGSRE-----  
RLAVEQEVLGREIEAAV-GP----SGG-----RWWRGIE-R-----WGGAARA-AGFAARPLSAFAVSQARLLLLRLHYPSSEG-----  
YLV-----QEA-RG-----ACFLGWQTRPLLSVSAW  
>OsGRAS-7 .  
-----LVLACADLVHRGD----LD-GARRVAEA--VL-A---AAD-----PRGE-----A-GDRLAHHFARALLALRGGG-KG-----  
GHG-----GGGGVVPSSAA-----YLAYIKIAPFLRFAHLTANQAI LEAAAA-----  
DAGGAHRR-----VLHIVDLD-AAHG----VQWPPLLQAIADRAD----PAVGP-----PP-----EVRLTGA-----  
-----GTD-RDVLRTGDRLRAFSSSLNLP-FRFHP-LIL-PC---TA--ELAADPTAA-----  
LEL--HPD----ETLAVNCVFLHKLGG-DGE-----  
LAAFLRWKSMNPVAVTIAERE-----GVLGGDVDDD-N-VPDELPRRV-----AAAMDYSSVFDAL-EA-T---VPPASAD-----  
RLAVEQEILSREIDA AV-AA---PGAG-GG---G-----RARDFDA---WASAARA-AGLAPRPLSAFAASQARLLLLRLHYPSSEG-----  
YKA-----DDDGG-RG-----ACFLRWQQRPLMSVSSW  
>AtSCR .  
LHLLTLLLQCAEAVSADN----LE-EANKLLE---I-SQ----LST----PYGT-----S-AQRVAAYFSEA-MSARLLN-SCL--GI---  
YAALPS-----RWMPQTHSL-----KMVSA-FQVFNGISPLVKFSHTANQAIQEAFE-----  
KEDS-----VHIIDL-D-IMQG----LQWPGLFHILASR-----PGG-----PP-----HVRLTGL-----  
-----GTS-MEALQATGKRLSDFADKLGLP-FEFCP-LAE-KVG-----NL-DT-----E-R---LNV-  
-RKR----EAVAVHWLQ--HSLY---DV-----TGSDAHT-----  
LWLLQRLAPKVVTVVEQDL-----SH---AGSFLGRFV-----EAIHYYSALFDSL-GA-S---YGESEEE-----  
RHVVEQQLLSKEIRNVL-AV---GGP--S---RS-----GEVKFES---WREKMQQ-CGFKGISLAGNAATQATLLLGM-FPSDG-----  
YTL-----VDD-NG-----TLKLGWKDLSLLTASAW  
>OsGRAS-41 .  
LHLLTLLLQCAEAVSADN----LD-EAHRALLE---I-AE---LAT----PFGT-----S-TQRVAAYFAEA-MSARLVS-SCL--GL---  
YAPLPN-----P-SPAAARLH-----GRVAAA-FQVFNGISPLVKFSHTANQAIQEAFE-----  
REER-----VHIIDL-D-IMQG----LQWPGLFHILASR-----PGG-----PP-----RVRLTGL-----  
-----GAS-MEALQATGKRLSDFADTGLGP-FEFCP-VAD-KAG-----NL-DP-----E-K---LGV-  
-TRR----EAVAVHWLQ--HSLY---DV-----TGSDSNT-----  
LWLIQRLAPKVVTVMEQDL-----SH---SGSFLARFV-----EAIHYYSALFDSL-DA-S---YSEDSPE-----  
RHVVEQQLLSREIRNVL-AV---GGP--A---RT-----GDVKFGS---WREKLAQ-SGFRVSSLAGSAAAQAVLLLGM-FPSDG-----  
YTL-----IEE-NG-----ALKLGWKDLSLLTASAW  
>AtGRAS-28 .  
IKLLSLLLQCAEYVATDH----LR-EASTLSE---I-SE----ICS-----PFGS-----S-PERVVAYFAQA-LQTRVIS-SYLS-GA---  
CSPLSE-----K-PLTVVQS-----QKIFSA-LQTYNSVSPKFSHTANQAIQFQALD-----  
GEDS-----VHIIDL-D-VMQG----LQWPALFHILASR-----PRK-----LR-----SIRITGF-----  
-----GSS-SDLLASTGRRADFASLNLFP-FEFCP-IEG-IIG-----NLIDP-----S-Q---LAT-  
-RQG----EAVVHWMQ--HRLY---DV-----TGNLET-----  
LEILRLKPNLITVVEQEL-----SY-DDGGSFLGRFV-----EALHYYSALFDAL-GD-G---LGEESGE-----  
RFTVEQIVLGTIEIRNIV-AH---GGG--R---R-----KRMK---WKEELSR-VGFRPVSLRGNPATQAGLLLGM-LPWNG-----  
YTL-----VEE-NG-----TLRLGWKDLSLLTASAW  
>OsGRAS-32 .  
LELVRALTACADSLASGN----HE-AANYYLAR--L-GE---MAS-----PAGP-----TPMHRVAAYFTEA-LALRVVR-MWP--HM---FD-  
-----IGPPRELTDDAFG-----GGDDAMA-LRILNAITPIPRFLHFTLNERLLREFE-----  
GHER-----VHVIDFD-IKQG----LQWPGLLQSLAAR-----AVP-----PA-----HVRLTGV-----  
-----GES-RQELQETGARLARVAAALGLA-FEFHA-VVD-RLEDV-----RL-----WMLHV-  
-KRG----ECVAVNCVLAMHRL--RD-----DA-----  
ALDFLGLARSTGATILLGEHEG-----GGLN-SGRWEARFA-----RALRYAAAFDAVDAA-G---LPEASFA-----RAKAEEM-  
FAEIRNAV-AF---EGP--E---R---FE-RHESFAG---WRRRMEDEGGGFKNAGIGEREAMQGRMIARMFDPK-----YTV-----  
QAH-----GGGGSGGEALTLRWLDQPLYTVTAW  
>AtGRAS-8 .  
FELVNLGTCLDAIRSRN----IA-AINHFIAR--T-GD---LAS-----PRGR-----TPMTRLIAYYIEA-LALRVAR-MWP--HI---FH-  
-----IAPPREFDRTV-----EDESIGNA-LRFLNQVTPIPKFIHFTANEMLLRAFE-----  
GKER-----VHIIDFD-IKQG----LQWPSFFQSLASR-----INP-----PH-----HVRLTGI-----  
-----GES-KLELNETGDRLHGFAEAMNLQ-FEFCP-VVD-RLEDV-----RL-----WMLHV-  
-KEG----ESVAVNCVMQMHTL--YD-----GTGA-----  
AIRDFLGLIRSTNPALVLAQEAE-----EH-N-SEQLETRVC-----NSLKYYSAMFDAI-HT-N---LATDSLIM-----  
RVKVEEMLFGREIRNIV-AC---EGS--H---R---QE-RHVGRFRH---WRRMLEQ-LGFRSLGVSEREVLSKMLLRMYGSDNEG-----  
FFNV-----ERSDE-DNGGEGGRGGG--VTLRWSEQPLYTISAW  
>OsGRAS-19 .  
--ILQSLSCSRAAATD-----PG-LAAAELAS---V-RA---AAT-----DAGD-----P-SERLAFYFADA-LSRLAC-G-T-----  
-----GAPPSAEPDA-----RFASDELTL-CYKTLNACPYSKFAHLTANQAI LEATG-----  
AATK-----IHIVDFG-IVQG----IQWAALLQALATRP-----EGK-----PT-----RIRITGV-----

```

--PSPLL--GPQPAASLAATNTRLRDFAKLLGVD-VEFVPLLR-PVH-----EL-NK-----S-D-----FLV-
-EPD-----EAVAVNFMLQLYHLL-----GDSDE-----
LVRRVRLAKSLSPAVVTLGEYEV-----SL-N-RAGFVDRFA-----NALSYYRSLFESL-DV-A-----MTRDSPE-----
RVRVERWFMFGERIQRAV-GP---EEGA-D---R---TE-RMAGSSE---WQTLMEW-CGFEPVPLSNYARSQADLLLLWNYDSKYK-----
YSLV-----ELP-PA-----FLSLAWEKRPLLTVSAW
>AtSCL4 .
--LLKAIYDCARISDS-----PN-EASKTLLQ---I-RE---SVS-----ELGD-----P-TERVAFYFTEA-LSNRL-----S-----
---PN-SP-----ATSSS-SSS-----TEDLILS-YKTLNDACPYKFAHLTANQAIILEATE-----
KSNK-----IHIVDFG-IVQG---IQWPALLQALATRT-----SGK-----PT-----QIRVSGI-----
--PAPSL--GESPEPSLIATGNRLRDFAKVLDLN-FDFIP-ILT-PIH-----LL-NG-----S-S-----FRV-
-DPD-----EVLAVNFMLQLYKLL-----DETPT-----
IVDTALRLAKSLNPRVVTTLGEYEV-----SL-N-RVGFANRVK-----NALQFYSAVFESL-EP-N---LGRDSEE-----
RVRVERELFGRRISGLI-GP---EKTG-I---H---RE-RMEEKEQ---WRVLMEN-AGFESVKLSNYAVSQAKILLWNYNSNL-----
YSIV-----ESK-PG-----FISLAWNDLPLLTSSW
>EsSCL4-1 .
--LLRAIYDCARILESE-----SD-VAAEALVR---I-RD---SVS-----ELGD-----P-TERLGFYFTEA-LCDRLSP-----
-----DSVPKESPS-----VEEMILS-YKTLNDACPYKFAHLTANQAIILEATE-----
NSNK-----IHIVDFG-IVQG---IQWPALLQALATRS-----SGK-----PI-----QVRVSGI-----
--PAPSL--GESPEPSLIATGNRLRDFAKVLDLN-FDFIP-ILT-PIH-----SL-NG-----S-T-----FRV-
-DPD-----EVLAVNFMLQLYKLL-----DETPT-----
IVDTALRLARSLNPIVVTTLGEYEV-----SL-N-RVAFANRMR-----NALKFYSAVFESL-EP-N---LGRDSEE-----
RVRVERVLFGRRIADLV-RPGN---NKPG-N---R---SG-RMEEKEQ---WRVLMES-AGFESVKLSNYAVSQAKILLWNYNSDL-----
YTIV-----ESM-PG-----FISLAWNDLPLLTSSW
>EsSCL4-2 .
--VLKAIHDCARNLEIK-----PD-VAAETLVR---I-RE---SVS-----DSGD-----P-TERVGFYFTEA-LSKRLSS-TAK-----
---KE-TE-----SPS-----LKDFFILS-YKTLNDACPFKFAHLTANQAIILEATH-----
NSSN-----IHIVDFG-IFQG---VQWAALQALATRA-----SGK-----PA-----RIRISGI-----
--PAPSL--GDSPGMSLIATGNRLRDFAAVLDLN-VEFYF-ILT-PIH-----LL-NV-----S-S-----FRV-
-EPD-----DFLAVNFMLELYKLL-----DETAT-----
IVDNALRLARSLNPRIVTLGEYEV-----SL-N-RVEFVNRVK-----NALRFYSAVFESL-EP-N---LERDSKE-----
RLRVERVLFGRRIADLV-RPGN---NKPG-N---R---SG-RMEEKEQ---WRVLMES-AGFEPVKPSNYAVSQASLLWNYNSTL-----
YSLV-----ESE-PG-----FISLAWNDVPLLTSSW
>AtSCL7 .
--IFKAIHDIYAR---K-----PE-TKPDTLIR---I-KE---SVS-----ESGD-----P-IQRVGYFAEA-LS-----H-----
---KE-TE-----SPSSSSSS-----LEDFILS-YKTLNDACPYKFAHLTANQAIILEATN-----
QSNN-----IHIVDFG-IFQG---IQWSALLQALATRS-----SGK-----PT-----RIRISGI-----
--PAPSL--GDSPGMSLIATGNRLRDFAAIIDLN-VEFYF-VLT-PIQ-----LL-NG-----S-S-----FRV-
-DPD-----EVLVNFMLELYKLL-----DETAT-----
TVGTALRLARSLNPRIVTLGEYEV-----SL-N-RVEFANRVK-----NSLRFYSAVFESL-EP-N---LDRDSKE-----
RLRVERVLFGRRIADLV-RSDDNNKPG-T---R---FG-LMEEKEQ---WRVLMES-AGFEPVKPSNYAVSQAKILLWNYNSTL-----
YSLV-----ESE-PG-----FISLAWNDVPLLTSSW
>CrSCL4-1 .
--ILKAIYDYAR---K-----PG-TIPETLTQ---I-RE---SVS-----ELGN-----P-IERVGFYFVEA-LS-----H-----
---KE-TE-----PSPAA-SSS-----LEEFILS-YKTLNDACPYKFAHLTANQAIILEATS-----
QSQN-----IHIVDFG-IFQG---IQWSALLQALATRA-----SGK-----PT-----RIRISGI-----
--PAPSL--GDSPEPSLIATGNRLRDFAAIIDLN-VEFNP-VLT-PIQ-----LL-TG-----S-S-----FRV-
-DPD-----EVLVNFMLELYKLL-----DETAT-----
GVGTALRLARSLNPRIVTLGEYEV-----SL-N-RVEFANRVK-----NSLRFYSAVFESL-EP-N---LERDSKE-----
RQRVERVLFGRRISELV-RTGNVNIKPG-T---R---LG-LMEEKEQ---WRVLMES-AGFEPVKPSNYAVSQAKILLWNYNSTL-----
YSLV-----ESE-PG-----FISLAWNDVPLLTSSW
>CrSCL4-2 .
--ILKAIYDYAR---K-----PG-TKPEALIQ---I-RE---SVS-----ELGN-----P-IERVGFYFAEA-LS-----H-----
---KE-TE-----PSPAASSS-----LEEFILS-YKTLSDACPYKFAHLTANQAIILEATS-----
QSQN-----IHIVDFG-IFQG---IQWSALLQALATRA-----SGK-----PI-----RIRISGI-----
--PAPSL--GDSPEPSLIATGNRLRDFAAIIDLN-VEFNP-VLT-PIQ-----LL-TE-----S-S-----FRV-
-DPD-----EVLVNFMLELYKLL-----DETAT-----
GVGTALRLARSLNPRIVTLGEYEV-----SL-N-RVEFSNRVK-----NSLRFYSAVFESL-EP-N---LERDSKE-----
RSRVERVLFGRRISELV-----RMD-NG-LMEEKEQ---WRVLMES-AGFEPVKPSNYAVSQAKILLWNYNSTL-----
YSLV-----ESE-PG-----FISLAWNDVPLLTSSW
>MgSCL4 .
--ILKALIDCARLSESD-----PE-NAMASLIQ---L-QD---SVS-----RVGD-----P-VERVSYFSEA-LCSRST---R-----
---AE-KT-----STIYDTTS-----EFTLS-YKALNDACPYKFAHLTANQAIILEATE-----
KANK-----IHIVDFG-IVQG---IQWAAFLQALATRP-----SGK-----PD-----RIRISGI-----
--PAPSL--GNSPAASLFATGNRLRDFAKLLDLR-FEFD-ILT-PVH-----EL-EG-----S-S-----FRV-
-DPD-----EVLAVNFMLQLYNLL-----DESND-----
GVEDALKLAKSLNPCVVTTLGEYEV-----SL-N-RVGFHLRFK-----NGLKYTAIFESL-EP-G---LARDSPE-----
RLQAERLLGRRIAGVV-GP---EE---R---K---RE-RMEDKER---WRFLMEG-AGFQPLVFSHYAQSQAQAKILLWNYTNSF-----
YKLL-----DS-----
>SlSCL4 .
--LLKSLVECARLAESE-----PE-NVVKSLIR---L-RE---SVS-----QQGD-----P-MERVGFFLEA-LYNRLSS-C-Q-----
---AE-RT-----PSIFGTAP-----EELTSL-YKAFNDACPYKFAHLTANQAIILEATE-----
KATR-----IHIVDFG-IVHG---IQWAAFLQALATRS-----AGK-----PV-----SVRISGI-----
--PSVVL--GNSPASLLATGNRLRDFAKLLDLN-FEFEP-ILT-PVQ-----EL-NG-----S-S-----FRV-
-DPD-----EILAVNFMLQLYNLL-----DETNV-----
GVKTALSLAKSLNPSIVTLGEYEV-----NL-N-DVGFLQRFK-----NALKYSTIFESL-DP-S---LTRDSAE-----
RVQVERLILGRRIAGAV-GL---DDGG-T---R---RE-CMEDKEH---WKELMEG-AGFKPVTLSHYAMSQAQAKILLWNYNSSS-----
FGLI-----DSA-PG-----FLSLAWKDNPLLTSSW
>StSCL4 .

```

```

--LLKSLVECARLAESE-----PE-NVVKSLIR---L-RE----SVS-----QQGD-----P-MERVGFFYLEA-LYNGLSS-C-Q-----
---AE-RT-----PSIFGTT-----EELTSL-YKAFNDACPYSKFAHLTANQAILEATE-----
KATR-----IHIVDFG-IVHG-----IQWAAFLQALATRS-----AGK-----PV-----SVRISGI-----
--PSVVL--GNSPAASLLATGNRLRDFAKLLDLN-FEFEP-ILT-PVQ-----EL-NG-----S-S-----FRI-
-DPD-----EILAVNFMLQLYNLL-----DETNV-----
GVETALSLAKSLNPSIVTLGEYEV-----NL-N-DVGFLQRFK-----NALKYYSTVFESL-DP-S-----LTRDSPE-----
RVQVERLLGRIAGAV-GL-----DDGG-T-----R-----RE-CMEDKEH-----WRELMEG-AGFKPVTLSHYAMSQAKILLWNYNYSSS-----
FGLI-----DSA-PG-----FLSLAWKDNPLLVSSW
>VvSCL4 .
--ILKALLDCARLADSE-----PD-RAVKSLIR---L-RE----SVS-----EHGD-----P-TERVAFYFSEA-LYSRVSH---Q-----
---AE-KR-----PTLFETSS-----EEFTLS-YKALNDACPYSKFAHLTANQAILEATE-----
RARK-----IHIVDFG-IVQG-----VQWAAALQALATRS-----AGK-----PA-----RIRISGI-----
--PAPAL--GKSPASSLFATGNRLRDFARLLDLN-FEFEP-ILT-PIQ-----EL-NE-----S-T-----FRV-
-DPD-----EVLAVNFMLQLYNLL-----DETPV-----
SVNAALRLAKSLNPKIMTLGEYEA-----CL-N-EVDFINRFK-----NALRYRAIFDSL-EP-N-----LARDSSD-----
RLQVERLLGRIAGVI-GP-----EPEG-T-----R-----RE-RMEDKEK-----WKFLVES-CGFESVPLSHYAVSQAKILLWNYNYSSL-----
YAI-----ESA-PG-----FLSLAWNKVPLLVSSW
>CpSCL4 .
--LFKALLDCARLAESE-----PD-RAVKSLIC---L-RE----SVS-----DQGN-----P-TERVGFYFTEA-LHSRSL---Q-----
---AE-KS-----LTIVETSC-----EDFTLS-YKALNDACPYAKFAHLTANQAILEATE-----
TASM-----IHIVDFG-IVQG-----VQWAAALQALATRT-----AGK-----PA-----RIRISGI-----
--PAPAL--GKSPGSSLLATGNRLRDFAKLLDLN-FEFEP-ILS-PIQ-----EL-NE-----A-T-----FRV-
-EPD-----EVLAVNFMLQLYNLL-----DETTA-----
AVEAALRLAKSLPKIVTLGEHEA-----SL-N-RVGFASRFN-----NALRFYAAVFESL-EP-N-----LTRDSPE-----
RLQVERLLGRIAGVI-GR-----EEPE-T-----R-----RE-RMEDKEQ-----WRVLMES-CGFDSVPLSHYAMSQAKILLWNYNYSSL-----
YSLI-----DSE-PG-----FLSLAWNEVPLLVSSW
>RcSCL4 .
--LKALLECARLAESE-----PE-RAVKSLIK---L-RE----SVC-----EHGD-----P-TERVAFYFTEA-LYSRCL---Q-----
---AE-KS-----LAMFETSS-----EEDFTLS-YKALNDACPYSKFAHLTANQAILEATE-----
GASK-----IHIVDFG-IVQG-----VQWAAALQALATRS-----AGR-----PL-----SIRISGI-----
--PAPVL--GKSPAASLLATGNRLRDFAKLLDLN-FEFVP-ILT-PIQ-----EL-NE-----S-N-----FRV-
-DPD-----EVLAVNFMLQLYNLL-----DETYG-----
AVETALKMAKSLNPEIVTLGEYEA-----SL-N-QIGYENRFK-----NALRYSAVFESL-EP-N-----LSRDSTE-----
RLQVERLLGRIAGAV-GP-----EEAG-T-----R-----RE-RIEDKEQ-----WRILMES-CGFESVALSHYAMSQAKILLWNYNYSSL-----
YSLV-----ESQ-PG-----FLSLAWNEVPLLVSSW
>MeSCL4-1 .
--LLKALLECARLAESE-----PD-KAVKSLVK---V-RE----SVS-----EQGD-----P-TERVAFYFTEA-LYSRVSQ---Q-----
---TE-RS-----LTMYETTS-----EDFTLS-YKALNDACPYSKFAHLTANQAILEATE-----
RATK-----IHIVDFG-IVQG-----VQWAAALQALATRS-----AGK-----PA-----RIRISGI-----
--PATVL--GKSPAASLFATGNRLRDFSKLLDLN-FEFEP-ILT-PIN-----EL-NE-----S-C-----FRI-
-DPD-----EVLAVNFMLQLYNLL-----DETPV-----
AVETALMAKSLNATIVTLGEYEA-----SL-N-RIGFVNRFK-----NALRYSAVFESL-EP-N-----LSRDSQP-----
RLQVEKFLGRIAGVI-GP-----EEAG-T-----R-----RE-CIEDKEQ-----WRILMES-CGFESVALSNYAMSQAKILLWNYNYSSL-----
YSLI-----ESQ-PG-----FLSLAWKEVPLLVSSW
>MeSCL4-2 .
--LLKALLECAILAESE-----PD-KAVKSLIK---M-RE----SVS-----EQGD-----P-TERVAFYFTEA-LYSRVSL---Q-----
---AE-KS-----LTIVETTC-----EEFTLS-YKTLNDACPYSKFAHLTANQAILEATE-----
SAGK-----IHIVDFG-IVQG-----VQWAAALQALATRS-----TGK-----PA-----RIRISGI-----
--PAPVL--GKSPAASLFATGNRLRDFAKLLDLN-FEFEP-ILN-PIQ-----EL-NE-----S-S-----FRV-
-DPD-----EVLAVNFMLQLYNLL-----AETPV-----
AVETALMAKSLNPRIVTLGEYEA-----SL-N-QIGYVNRFK-----NALRYFSSVFESL-EP-N-----LSRDSPE-----
RLQVEKLLGRIAGVI-GP-----EEAG-S-----R-----RE-RIEDKEQ-----WRVLMES-CGFESVALSHYAMSQAKILLWNYNYSSL-----
YSLI-----ESQ-PG-----FLSLAWKEVPLLVSSW
>TcSCL4 .
--LLKALLDCARLAESE-----PE-RAIKSLIR---L-RE----SIS-----ECGD-----P-TERVAFYFTEA-LYSRVSR---Q-----
---AE-KR-----LTILDTS-----EEFTLS-YKALNDACPYSKFAHLTANQAILEATE-----
RASK-----IHIVDFG-IVQG-----VQWAAALQALATRS-----AGK-----PT-----QIRISGI-----
--PAPVL--GKSPASSLYATGNRLRDFAKLLDLN-FEFEP-ILT-PIE-----EL-NE-----L-S-----FRV-
-DQD-----EVLAVNFMLQLYNLL-----DEAPV-----
TVETALLAKSLNPKIVTLGEYEA-----SL-N-RVGFENRFK-----NALRYSAVFESL-EP-N-----LPRDSPE-----
RIQVERLLGRIAGVI-GP-----EEVE-K-----R-----RE-RMEDKEQ-----WKNLLES-AGFETVALSHYARSQARILLWNYNYSSS-----
YSLI-----ESQ-PG-----FLSLAWNEVPLLVSSW
>GrSCL4-1 .
--LLKALLDCARLSDSE-----PE-RAIKSLVE---L-RE----SVS-----ERGD-----P-TERVAFYFTQA-LYSRVSL---P-----
---AE-KR-----LNLLETTS-----EDFTLS-YKVLNDACPYSKFAHLTANQAILEATE-----
RATK-----IHIVDFG-IVQG-----VQWAAALQALAARS-----AGK-----PT-----RIRISGI-----
--PAPVL--GSSPAPSLYATGNRLRDFAKLLDLN-FEFEP-ILT-PIK-----EL-KE-----S-C-----FRV-
-DND-----EVLAVNFMLQLYNLL-----DATPV-----
TVEAALCLAKSLNPKIVTLGEYEA-----SL-N-RVGFVNRFK-----NALRYTAVFESL-EP-N-----LPRDSPE-----
RVEVERQLLGGKIGAI-GA-----EEAE-K-----R-----RE-RMEDKEQ-----WKVLMES-AGFETVSLSHYAISQAKILLWNYNYSSS-----
YSLI-----ESK-PG-----FLTLAWKEVPLLVSSW
>GrSCL4-2 .
--LLKALLDCATLADSE-----PE-RAIKSLAK---L-KE----SVS-----EHGD-----P-TERVAFYFTEA-LHSRSLH---Q-----
---TD-QR-----LTMIEETS-----EDFTLS-YKALNDACPYSKFAHLTANQAILEATD-----
RASK-----IHIVDFG-IVQG-----VQWAAALQALATRS-----AGK-----PT-----RIRISGI-----
--PAPVL--GSTPAPSLYATGNRLRDFSKLLDLN-FEFEP-ILT-PVT-----EL-TG-----S-S-----FRV-
-DED-----EVLAVNFMLQLYNLL-----DSTPA-----
AVETALALAKSLNPKIVTLGEYEA-----SL-N-RVGFNRFK-----NALRYSAVFESL-EP-N-----LPRDSPE-----

```

```

RIQVEKHLGRKVGVI-GR----EEAG-T-----Q----RE-RMEDKEQ---WKILMEI-SGFETVTLSHYAISQAKILLWNYNYSSS-----
YSLI-----ESQ-PG-----FLSLAWNEVPLLTVSSW
>FvSCL4 .
--LLKALLDCARVIESE-----PE-RAIKSLVR---L-RE----SVS-----ERGD-----P-TERVTRFRFTEA-LYSRVSP---P-----
---PD-KT-----SAAYDGSC-----EEDFTLS-YKALNDACPYSKFAHLTANQAILEATE-----
RATK-----IHIVDFG-IVQG---VQWAALLQALATRS-----TGK-----PS-----KIRISGI-----
--PAPSL--GNSPAASLFATGNRLCEFAKLELN-FEFEP-VLT-PIQ-----EL-NE-----S-C-----FRV-
-DPD-----EFLAVNLMLQLHNL-----DESTT-----
GVEAALTAKLLNPKIVTLGEYEA-----KL-N-RVGFMSRFK-----TALKYYKAMFESL-EP-N---MARDSPE-----
RLQVERLLGRRIASV-VA---EESG-T---K---RQ-RLEDKEQ---WKFLMES-AGFEPVTLSHYAVSQAKILLWNYNYSSS-----
YSLI-----ESP-PG-----FLSLAWKEVPLLTVSSW
>MdSCL4-1 .
--LLKALLDCARLAESD-----PD-GAVKSLVR---L-RE----SIS-----DHGD-----P-TQRFVAFYFAEA-LQNRVSF-L-Q-----
---SE-KS-----F-----TTAHDTPC-----EDFTLS-YKALNDACPYSKFAHLTANQAILEATE-----
RATK-----LHIVDFG-IVQG---VQWAALLQALATRS-----TGK-----PV-----SIRISGI-----
--PAPSL--GDSPAASLIATGNRLREFAXLLELN-FEFEP-ILT-PVH-----QL-DE-----S-C-----VRV-
-DPD-----EALAVNLVQLYNLL-----DEKPT-----
AVQSALKLAKSLNPKIVTLGEYEA-----NL-N-RVGFASRFK-----NALKYYAALFESL-EP-N---MIRDSPE-----
RLKVERLLGRRIGSLV-GP---EQPG-T---K---RE-RFEDKEQ---WKYLMES-SGFEPVALSXYSVSQAKILLWNYNYSSL-----
YSLI-----ESP-PG-----FLSLWNEVPLLTVSSW
>MdSCL4-2 .
--LLKALLDCARLTESD-----TD-RAVKSLIR---L-RE----SIS-----DHGD-----P-TERVAFYFAEA-LHNRVSV-L-Q-----
---SE-KT-----F-----TTAYDTPC-----EDFTLS-YKALNDACPYSKFAHLTANQAILEATE-----
RATK-----IHIVDFG-IVQG---VQWAALLQALATRS-----TGK-----PV-----SIRISGI-----
--PAPSL--GDSPAASLFATGNRLREFAXLLELN-FEFEP-ILT-SVN-----EL-DE-----S-C-----FRF-
-EPE-----EALAVNFMLQLYNLL-----DDKPA-----
AVHSALKLAKSLNPKIVTLGEYEA-----NL-N-RVEFASRFK-----NALKYYTALFESL-EP-N---LTRDSPE-----
RLKVERLLGRRIGGLV-GP---EQSG-T---K---RE-RFEDKEQ---WKYLMES-SGFESVALSHYSVQAKILLWNYNYSSL-----
YSLI-----ESP-PG-----FLSLWSEVPLLTVSSW
>PpSCL4 .
--LLKALLDCARLAESD-----PD-RAVKSLIR---L-RE----SVS-----DRGD-----P-TERVGFYFTEA-LQSRVSS-L-Q-----
---SE-KSLA-----ATTTYDTAC-----EDFTLS-YKALNDACPYSKFAHLTANQAILEATE-----
RATK-----IHIVDFG-IVQG---VQWAALLQALATRS-----TGK-----PS-----RIRISGI-----
--PAPSL--GTSPAASLFATGNRLRDFAKLLELN-FEFEP-ILT-PVH-----EL-DE-----S-C-----FRV-
-EPD-----EALAVNLMLQLYNLL-----DETPT-----
AVQSALKLAKSLNPKIVTLGEYEA-----NL-S-RVGFSTRFK-----NALKYYTALFESL-EP-N---MTRDSPE-----
RLKVEKLLGRRIGGVV-GP---EQPG-T---K---RE-RFEDKEQ---WKYLMES-SGFEPVALSHYSVQAKILLWNYNSL-----
YSLI-----ESP-PG-----FLSLAWNEVPLLTVSSW
>LuSCL4-1 .
--LLQSLLECARLSESE-----TE-SAVKSLVK---I-RV---SAS-----EHGN-----P-TERVAYYFSEA-LYNRLSK---Q-----
---AG-ES-----FTMFETTS-----EEFTLS-YKSLNDACPYSKFAHLTANQAILEATE-----
TATK-----IHIVDFG-VVQG---VQWAALLQALATRS-----AGK-----PV-----LVRISGI-----
--PAPAL--GSSPAASLFATGKRLLDFAKLLDLN-FEFEP-ILT-PIQ-----DL-NE-----S-C-----FRV-
-EPD-----EVLTVNFMLQLFNLL-----DETTA-----
TVETALMAKSLNPRIVTLGEYEV-----SL-N-RIGYLTRFN-----NALKYYSAVFESL-EP-S---LSRDSTE-----
RLEVERMLLGRRIAGVI-GP---EPPGVV---Q---RE-RMEDREQ---WRLLMEK-CGFESVALSNYAMSQAKILLWNYNSPR-----
YSLV-----ESK-PG-----FVSLAWKEVPLLTVSSW
>LuSCL4-2 .
--LLKSLLECARLSESE-----TE-SAVKSLVK---I-RE----SVS-----EHGD-----P-TERVAYYFTEA-LYNRLSK---Q-----
---AG-EN-----FIMFETTS-----DEFTLS-YKSLNDACPYSKFAHLTANQAILEATE-----
TAAK-----IHIVDFG-VVQG---VQWAALLQALATRS-----AGK-----PA-----LVRISGI-----
--PAPAL--GSSPAASLFATGKRLLDFAKLLDLN-FEFEP-ILT-PTQ-----DL-NE-----S-C-----FRV-
-EPD-----EVLAVNFMLQLFNLL-----DESTA-----
TVETALMAKSLNPRIVTLGEYEV-----SL-N-RIGYLTRFN-----NALRYSAVFESL-EP-S---LSRDSTE-----
RLEVERMLLGRRIAGVI-GP---EPPGVV---K---RE-RMEDREQ---WRLLMEM-CGFEPVALSNYAMSQAKILLWNYNSPR-----
YSLV-----ESK-PG-----FISLAWKEVPLLTVSSW
>PtSCL4-1 .
--VLKALVECAQLVESK-----AD-QAVKSLVK---C-KD---LVS-----ENGD-----P-VERAGFYFAEG-LCRRVAV-G-E-----
---LD-VL-----KNFDQ-TS-----EEFTLS-YKALNDACPYSKFAHLTANQAILEATE-----
KASK-----IHIVDFG-IVHG---VQWAALLQALATRS-----AGK-----PV-----RIRISGI-----
--PAPVL--GKNPAASLLATGNRLLDYAKLLGLN-FEFEP-ILT-PIQ-----EL-NE-----S-C-----FRA-
-EPD-----EVLAVNFMLQLYNLL-----DESPV-----
AVETALKMAKSLNPKIVTLGEYEA-----SL-N-RVGYLTRFK-----NALRYTAVFESL-EP-N---LSRDSPE-----
RLQVERLLGQRISVV-GP---EPPG-M---R---RE-RMEDKQ---WGVLMES-SGFESVSLSHYAMSQAKILLWNYNSDL-----
YSLD-----DSQ-PG-----FLTLAWNEVPLLTVSSW
>PtSCL4-2 .
--VLKALVECAQLVESK-----AD-QAVKSLIR---F-KE---SVS-----ENGD-----P-GERVGFYFVKG-LCRRVAV-G-E-----
---LD-DL-----KNFHQTS-----EEFTLC-YKALNDACPYSKFAHLTANQAILEATE-----
KASK-----IHIVDFG-IVQG---IQWAALLQALATRS-----AGK-----PV-----RIRISGI-----
--PAPVL--GKNPAASLLATGNRLLDYAKLLDLN-FEFEP-ILT-PIQ-----EL-NE-----S-C-----FRV-
-EPD-----EVLAVNFMLQLYNLL-----GETPG-----
AVETALKMAKSLNPRIVTLGEYEV-----SL-N-RVGYLTRFK-----NALRYTAVFESL-DP-N---MSRDSQE-----
RLQVERLLGRRISGVV-GP---D--G-I---R---RE-RMEDKEQ---WRVLMES-SGFESVSLSHYAMSQAKILLWNYNSSTM-----
YSLD-----DSQ-PG-----FLTLAWNEVPLLTVSSW
>CsSCL4-1 .
--VLKVLDCARLCDSE-----PN-RAAKTLNR---I-SK---SLR-----EDGD-----P-IERVGFYFGDA-LRKRLLS-T-P-----
---MK-NCLD-----STESDANS-----EDFLLS-YKALNDACPYSKFAHLTANQAILEVTE-----
RASK-----IHIVDFG-IVQG---VQWAALLQALATRA-----TGK-----PV-----RVRISGI-----

```

```

--PAPSL--GDSPAASLYATGNRLSEFAKLELN- FEFQP-ILT-PIE-----NL-KE-----S-S-----FSV-
--QSD-----EVLAVNFMLQLYNLL-----DENPT-----
GVHNALRLAKSLSPHIVTLGEYEA-----SL-N-RNGFYNRFK-----NALKFYSAIFESL-EP-N-----LPRNSPE-----
RLQLERLLGRRIAGVV-GTV--EDSRRE----R----RV-RMEDKEQ---WKNLMEN-TGFEPVALSHYAISSQAKILLWNYNYSSL-----
YTLI-----ESA-PE-----FLSLAWNDVPLLTVSSW
>CsSCL4-2 .
--LLKTLIECARISESE-----PD-RAAQTLIK---L-KE----SSS-----EHGD-----P-TERVAFYFMDA-LCRRLS-----
-----
-----
-----
-----
-----LPSDS-----R-LI-----
-----
-----
>GmSCL4-1 .
--LLKALSECASLSETE-----PD-QAAESLSR---L-RK----SVS-----QHGN-----P-TERVGFYFQWA-LSRKMWG---D-----
--KE-KM-----EPSS-----WEELTLS-YKALNDACPYSKFAHLTANQAILEATE-----
NASN-----IHILDFG-IVQG---IQWAALLQAFATRA-----SGK-----PN-----KITISGI-----
--PAVSL--GPSPGSLSATGNRLSDFARLLDLN-FVFTP-ILT-PIH-----QL-DH-----N-S-----FCI-
-DPN-----EVLAVNFMLQLYNLL-----DEPPS-----
AVDTALRLAKSLNPRIVTLGEYEA-----SV-T-RVGFVNRFR-----TAFKYFSAVFESL-EP-N---LAADSPE-----
RFQVESLLGRRIAIVI-GP-----GPV-----RE-SMEDKEQ---WRVLMER-AGFESVSLSHYAISSQAKILLWNYNYSSL-----
FSLV-----ESKPPG-----FLSLAWKDVPLLTVSSW
>GmSCL4-2 .
-----
-----
-----FDQLTANQAILEATQ-----
TASN-----IHIVDFG-IVQG---IQWAALLQAFATRP-----SGK-----PN-----KIRISGI-----
--PALS--GSSPGSLSATAHRLSDFAKLLDLN-FHFTP-ILT-PIH-----QL-DR-----N-S-----FCI-
DDTN-----EALAVNFMLQLYNLL-----DEPPT-----
AVDTALRLAKSLNPKIVTLGEYEA-----SV-T-RVGFVNRFK-----TAFKYFSAVFESL-EP-N---LAADSPE-----
RFQVESLLGRRIAIVI-GP-----GSV-----R-----RE-SMEDKEQ---WRVLMER-AGFESVSLSHYAISSQAKILLWNYNYSSL-----
FSLV-----ESTPPG-----FLSLAWKDVPLLTVSSW
>PvSCL4 .
--LLKALTECASFAESE-----PD-QAAESLAR---L-RK----SVS-----QHGN-----P-TQRVGFYFCEA-LSRKIWA---E-----
--KE-KA-----EPTSTSTTTTTS-----EELTLS-YKAMNDACPYSKFAHLTANQAILEATD-----
GAAN-----IHILDFG-IVQG---IQWAALLQAFATRS-----SGK-----PN-----KIKISGI-----
--PAIAL--GASPGSLSATGNRLSEFAKLLDLN-FEFTP-ILT-PIH-----HL-DH-----N-S-----FCI-
-DPD-----EALAVNFMLQLYNLL-----DEPPT-----
AVDTALRLAKSLNPKIVTLGEYEA-----SL-T-RVGFVNRFK-----TAFNYFSAVFESL-DP-N---LPADSPE-----
RFQVESLLGRRIIDAVI-GP-----GPA-----RE-SMEDREQ---WRVLMER-AGFESVSLSHYAVSQAKILLWNYGYSSL-----
FSLV-----ESTPPG-----FLSLAWKDVPLLTSSW
>MtSCL4 .
--LLKTLTEIASLIETQK-----PN-QAIETLTH---L-NK----SIS-----QNGN-----P-NQVRSFYFSA-LTNKITA---Q-----
--SS-----IASSNSSTT-----WEELTLS-YKALNDACPYSKFAHLTANQAILEATE-----
GSNN-----IHIVDFG-IVQG---IQWAALLQAFATRS-----SGK-----PN-----SVRISGI-----
--PAMAL--GTSPVSSISATGNRLSEFAKLLGLN-FEFTP-ILT-PIE-----LL-DE-----S-S-----FCI-
-QPD-----EALAVNFMLQLYNLL-----DENTN-----
SVEKALRLAKSLNPKIVTLGEYEA-----SLTT-RVGFVERFE-----TAFNYFAAFESL-EP-N---MALDSPE-----
RFQVESLLGRRIIDAVI-GV-----RE-RMEDKEQ---WKVLMEN-CGFESVGLSHYAISSQAKILLWNYNYSSL-----
YSLV-----ESQ-PA-----FLSLAWKDVPLLTSSW
>CcSCL4 .
--LTKALIDCARLVESE-----PD-KAVKSLVR---L-RG----SVC-----AHGN-----P-TERVAYYFTEA-LYKRLTQ---R-----
--AE-KS-----ITTLEANC-----EDCILS-FKTLNDACPYSKFAHLTANQAILEATE-----
NASH-----IHIVDFG-IVQG---IQWSFLLQALANRP-----TGK-----PV-----KVRISGI-----
--PAPAL--GKSPAASLLATGDRRLREFAGSLSLN-LEFEP-ILI-PIR-----KL-RA-----S-S-----FRV-
-DPN-----EALVVNFMLQLNSLL-----DDNRL-----
AVENALQMAKSLNPNVVTLAIEYEA-----NL-N-RTGFLARFK-----NALKYYTAVFESL-EP-N---MTTDSDE-----
RFQVERQILGPRIANLL-AP---EKQG-A---K---RE-RVEDIEN---WRIFMEN-SDFEGIPFSHYALSQAIEILLWNYNYSSL-----
FTLN-----QSH-DN-----LLTSLWKKVPLLTSSW
>CsiSCL4 .
--LTKALIDCARLVESE-----PD-KAVKSLVR---L-RG----SVC-----AHGN-----P-TERVAYYFTEA-LYKRLTQ---R-----
--AE-KS-----ITTLEANC-----EDCILS-FKTLNDACPYSKFAHLTANQAILEATE-----
NASH-----IHIVDFG-IVQG---IQWSFLLQALANRP-----TGK-----PV-----KVRISGI-----
--PAPAL--GKSPAASLLATGDRRLREFAGSLSLN-LEFEP-ILI-PIR-----KL-RA-----S-S-----FRV-
-DPN-----EALVVNFMLQLNSLL-----DDNRL-----
AVENALQMAKSLNPNVVTLAIEYEA-----NL-N-RTGFLARFK-----NALKYYTAVFESL-EP-N---MTTDSDE-----
RFQVERQILGPRIANLL-AP---EKQG-A---K---RE-RVEDIEN---WRIFMEN-SDFEGIPFSHYALSQAIEILLWNYNYSSL-----
FTLN-----QSH-DN-----LLTSLWKKVPLLTSSW
>EgSCL4 .
--LLKALLDCARVSESD-----PE-LAAKTLAR---L-RE----SAS-----ERGD-----P-AERVAFYFSDA-LHSRLSL-D-----
-----GSPIASSTS-----PEEFTLS-YKALNDACPYSKFAHLTANQAILEATE-----
KASK-----IHIVDFG-IVQG---VQWAALLQALATRS-----TGK-----PD-----RIRISGI-----
--PARAL--GENPAPSLATGNRLREFAKLLDLN-FEFVP-ILD-PTD-----SL-DA-----A-S-----FRV-
-DPD-----EDLAVNFMLQLYNLL-----GETSA-----
AVDAALRLSKSLGPKIVTLGEYEA-----SL-N-RAPYPARFK-----NALAYYAAVFESL-EP-N---MSRDSLQ-----
RREVERLLGRRIIVRSV-GPEAP-PGTG-A---E---RE-RMEDKEQ---WRALMER-AGFEAVPLSHYAVSQAKILLWNYKYSEL-----
YSLQ-----DSP-PG-----FLSLAWNKAPLLTVSAW
>AcSCL4-1 .

```



```

CSLLKSLLLCARISDSE-----PE-KAIKTLNR---L-RE----SVS-----ERGD-----S-TERVAFYFSEA-LFSRISS---K-----
---SL-KN-----FPTFDSNS-----EFLLS-YKALNDACPYSKFAHLTANQAIILEATE-----
SANQ-----IHIVDFG-IVQG---LQWAALLQALATRS-----SGK-----PT-----LIRISGI-----
--PAPAL--GKSPAASLIATGNRLREFAELLELN-IQFEP-ILT-PIE-----EL-NE-----S-S-----FRV-
-NSD-----EVLAVNFMLQLYNLL-----GETTL-----
AVEKALKLAKSLNPKVLTGLGEYEV-----SL-N-RVEYYDRFK-----NAMKYSAVFESL-EP-S----LERDSED-----
RLQVERLILGRRIMSVV-GP---GEGS-M---R---RE-RMEEKEE---WKNLIES-CGFETAVSHYAVSQADILLWNYNYSSK-----
YSLV-----ESP-PG-----FLSLCWNGTPLLTVSSW
>AcSCL4-2 .
CSLLKSLLLCARISDSE-----PE-KAIKTLNR---L-RE----SVS-----ERGD-----S-TERVAFYFSEA-LFSRISS---K-----
---SL-KN-----FPTFDSNS-----EFLLS-YKALNDACPYSKFAHLTANQAIILEATE-----
SANQ-----IHIVDFG-IVQG---LQWAALLQALATRS-----SGK-----PT-----LIRISGI-----
--PAPAL--GKSPAASLIATGNRLREFAELLELN-IQFEP-ILT-PIE-----EL-NE-----S-S-----FRV-
-NSD-----EVLAVNFMLQLYNLL-----GEITL-----
AVEKALKLAKSLNPKVLTGLGEYEV-----
-----
-----
>MaSCL4-1 .
--LLESLLDCARIADSD-----PD-LAAKSLIH---V-RE----SAS-----ESGD-----P-TERVAFYFAEA-LYRRLHG-----
---AQRKHHS-----YPSTAAAPPSCSSSS-----FDSSPEDFTLC-YKALNDACPYSKFAHLTANQAIILEATE-----
SAAR-----IHIVDFG-IMQG---VQWAALLQALATRP-----SGK-----PS-----RVRISGI-----
--PAPAL--GAAAAASLAATGNRLRDFAAILLDLDFEFDP-ILT-PIS-----EL-SA-----S-T-----FRV-
-DPE-----ETLAVNFMLQLCHLL-----GDSPE-----
PVERVLRVAKSLGPRVVTLGEYEA-----SL-N-RAAFLEFR-----TALAYAAVFDL-DP-A---MQRDSAE-----
RARVERLLFGRRILGVV-GPG---DEQ---I---R---RE-RMEANAE---WRAVMEQ-CGFETVPLSNYAVSQAKLLWNYNYSSK-----
YTLS-----DSA-PV-----FLSLAWGDRPLLTVSSW
>MaSCL4-2 .
--LLESLLDCARLADGD-----PD-LAAKSLIH---V-RE----SAS-----VLGD-----P-TERVAFYFAEA-LNRRLLG-----
---DQ-KDHS-----HPST-----VAVFNDACPYSKFAHLTANQAIIVEATE-----
SAAR-----IHIVDFG-IIQG---IQWAALLQALATRP-----RGK-----PS-----RVRVSGI-----
--PAPML--GAAPAASLTATGNRLRDFAAILLDLDFEFDP-ILT-PIA-----EL-TV-----S-C-----FRI-
-DSD-----EVLAVNFMLQLYHLL-----ADSPE-----
SVERVLGIKSLVPRVVTLGEYEA-----SV-N-RGRFVERFK-----AALAYAAVFDL-DP-A---IRRDSAE-----
RAQMERVLLGPRILGAV-GAG---DGPN-----R---RE-RMEAKEE---WRAVMER-CGFEPVPSNFVAVSQAKLLWNYDYSSK-----
YAVL-----DSA-PG-----FLTLAWGDRPLLTVSSW
>MaSCL4-3 .
--LLESLLQCARLADSD-----PH-LATKSLIH---V-RE----SAS-----ELGD-----P-TERVAFYFAEA-LHRRLLG-----
---AQRKH-----PLPTSAPQPPSLDSSP-----EFTLTC-YKVLNDACPYFKFAQLTANQAIIEATE-----
SAGR-----IHIVDFG-IVQG---VQWPSLLQALATRP-----SGK-----PS-----KVRISGI-----
--PAPALG-GAAIATSLAATGNRLRDFAAILLDLDFEFDC-ILT-PIP-----EI-AA-----S-T-----FRV-
-DPD-----ELVVVNFMLQLSOLL-----GDSPE-----
PVERVLRVAKSLGPRILTLAEYEA-----SL-N-HAGFVDRFG-----AALGHYAAVFESL-EP-A---MGRDAVE-----
RARMERVLIGHRILEAV-GPF---EGQN-----R---RV-RMAPKEE---WRAVMER-CGFSSVPLSNYAVSQAKLLWNYNYSSR-----
YTLL-----DSP-PP-----CLTLAWGDRPLLTVSSW
>PaSCL4 .
--LLHSLLDCAKIVDTE-----PE-RAGQSVAY---L-QS---IAS-----QHGD-----P-TQRIVFHADA-LAKRLSK-G-----
---IE-QK-----P-QFSSDECS-----KSFEGLTLA-YKALNDACPYSKFAQLTGNQAIILEAMD-----
KAEK-----IHIVDFG-IVQG---VQWAALLHAFATRP-----GGK-----PQ-----KIKITGI-----
--PAPTL--GQNPTSSLLATGKRLTEFAKLLDLE-FEFCP-VSK-HMS-----EV-EL-----S-T-----LKI-
-EQD-----ECIAVNFMLQLYNLL-----GDSPE-----
PLVKILKLAHALSPKVVTLGEYEA-----YL-N-ACHFQVFR-----NALDYFSAFFDSM-EPTN---MSRDCAE-----
RLNVEKLFFAEKIMGIV-----AFEGAE-----R---KT-RLEGRDQ---WRILMES-AGFKFTNLSHYAKSQARILL---YNYCEG-----
YSLQ-----ESS--G-----FLSLAWQTRPLLTVSAW
>AtriSCL4 .
--LLLSLVDAARTVHSD-----PG-HAAASLAE---L-RR---SAP-----DSGS-----P-TERLVSYFAEA-LIERLDP-T-----
-----GHPVAQFSA-----EESTLC-YKALNDACPFKFAHLTANQAIILEAME-----
TADS-----IHIVDFG-IVQG---VQWAALLQALATRP-----AGK-----PA-----KIRISGI-----
--PAPSL--GSNPAPSLAATGNRLCDFAKLLELN-FEFSP-VPC-SIE-----DV-ME-----G-D-----LRR-
-ADG-----EFVAVNFMLQLHRLV-----DEKME-----
KVARALRVAKALKPKVVTLGEYEL-----GL-N-RGDFMGRLS-----RALRYYGAMFECL-EA-G---MGRACKE-----
RERVERVIGRRIAGAV-----K---N---TE-RMEERCI---WREEIER-AGFVGLGLSHYAVSQARMLLWNYDYSSS-----
YSLI-----EAG-PG-----FLTLAWKDQPLLTVSAW
>PpatSCL4 .
VHLVHLLLECATQIEKN-----QH-LAVSTLCR---L-RD---LSS-----PLGD-----P-MQRVAAYFCDA-LTKRIAR-G-K-----
---GE-AD-----P-GVLEAPHNSPK-----A-CQVLNEACPYMKFAHLTANQAIILEAVK-----
GCES-----VHILDFG-I THG---IQWAALLQAFASLP-----KKQP---PP-----KVRITGIS-----
VNNPA-----SESASLSVLATGKRLQSF AEHLNVE-FEFCPVILV-SME-----DF-TP-----E-S-----
IQL--NPD---EKTVANFMLQLHEML-----DEEGS-----
PSILRLLRSVISLSPALVTLTEHDA-----AL-N-RPEFRPRFM-----DALHFYCALFDSL-DS-T---MPRCHD-----
RLNVENNYFAKQIENIV-----ANEGVD---R---TE-RYECTET---WIRIMET-VGFTLVPLSHYAYSQAQQLLWQF--CDS-----
FRLQ-----RPS--G-----CIALAWQDRSLITVSAW
>SmSCL4-1 .
-QLVQLLVSCLDDEMSESGQ---AS-PAMDKLAT---L-KA---MAS-----SSGN-----A-VEKCAWYFSSG-LEARLHR-RGG-----
---DD-HS-----DG-DDEEESPSSSP-----NKAEAIAMA-YKTLTDACPYLKF AHLTANQAIILEATD-----
GAPK-----IHIVDYG-TMQG---VQWAALFQAFATWP-----AKNP---SPR-----SLRITGI-----
--PSPHL--GSNPAPAMLATQRRRTDFAKLLGVD-FQFCP-ILE-PIR-----DF-QP-----SQS-----LRT-
-DPD-----EVLAVNFVLQALQL-----PA-----
PALKRAFSLVQRLNPRIVTVAEYEA-----N--N-GASLRDQLA-----SNARFYSSVFESL-DV-A---LPGDDPQ-----

```

RITAERLFFGREITKSL-----V---EG-T-----N---CE-CPEKQRE---WQRCIDG-AGLWSAALSHYTVSQARLLLLWLYNKSEN-----  
FTLL-----QG--PG-----SLSLGLWLGTSIVTVSAW  
>SmSCL4-2 .  
-QLVQLLVSCLDMMESGQ-----AS-SAMDKLAT---L-KA---MAS-----SSGN-----A-VEKCAWYFSSG-LEARLHR-RGG-----  
---ND-HS-----DGDDDEEEESPSSP-----NKAEAIAMA-YKTLTDACPYLKFAHFTANQALLEATD-----  
GAPK-----IHIVDYG-TMQG---VQWAAFLQAFATWP-----AKNP---SPR-----SLRITGI-----  
--PSPHL--GSNPAPAMLATQRRLTDFAKLLGVD-FQFCP-ILE-PIR-----GGP-----DF-QP-----SQS-----LRT-  
-DPD-----EVVAVNFVLQALQ-----PA-----  
PALKRAFSLVQRLNPRIVTVAEYEA-----N--N-GASLRDQLA-----SNARFYSSVFESL-DV-A---LPGDDAQ-----  
RITAERLFFGREITKSL-----V---EG-T-----N---CE-CPEKQRE---WQRCIDG-AGLWSAALSHYTVSQARLLLLWLYNKSEN-----  
FTLL-----QG--PG-----SLSLGLWLGTSIVTVSAW  
>OsGRAS-28 .  
VRMIALLMECAAAAMSVGN-----LA-GANGALLE---L-SQ---MAS-----PYAA-----SCGERLVAYFARA-MAARLVG-SWV-----  
-----GVVAPMAPPPS-----CGAINAA-FRALYVAVFARLAYLACNQAI LEAFH-----  
GKRL-----VHIVDLD-VVPGG--ALQWLSLLPALAARP-----GGP-----P-----VIRVTGF-----  
-----GMS-ASVLHDTGNQLAGLARKLCMF-FEFYA-VAK-RPG-----DADAVA-----DM-----PG-R-----  
-RPG-----EAVAVHWLR--HAMY--DA-----AGDDGAS-----  
MRLVWRLEPAAVTLVEQER--AHGGGG---G-HGRFLDRFV-----SALHHYSAVFDAM-GA-SR---PDGEDAS-----  
RHIAEHGVLGREIANVL-AV---GGP--A---R---SS-GREGPGS---WREVLAR-HGFAHAGGGGGGRAQ---LVAAACPGGLG-----  
YTVAGDH-----DG-----TVRLGWKGTPLYAVSAW  
>OsGRAS-1 .  
IRLVHLLMSCAGAI EAGD---HA-LASAQLAD---SHAALAAVS---AASG-----IGRVAVHFTTA-LSRRLFP-S-----  
-----PVAPPTTDAEHAF---L-----YHHFYEACPYLKFAHFTANQAI LEAFH-----  
GCDH-----VHVIDFS-LMQG---LQWPALIQALALRP-----GGP-----P-----FLRITGI-----  
GPPSP-T--GRD---ELRDVGLRLADLARSVRVR-FSFRGVAAN-SLD-----EV-RP-----W-M---LQI-  
-APG-----EAVAFNSVLQHLRL-----GDPAD-----  
QAPIDAVLDCVASVRPKIFTVIEQEA-----DH-N-KTGFLDRFT-----EALFYSAVFDLDA---ASASGGA-----  
GNAMAEAYLQREICDIV-CG---EGA--A---R---RE-RHEPLSR---WRDLRTR-AGLSAVPLGSLNALRQARMLVGLF-SGEG-----  
HSV-----EEA-DG-----CLTLGWHGRPLFSASAW  
>AtRGA .  
VRLVHALMACAEAIQNN-----LT-LAEALVKQIGCL-----AVS---QAGA-----MRKVATYFAEA-LARRIYR-----  
-----LSPPQNQIDHCLSD---TL-----QMHFYETCPYLKFAHFTANQAI LEAFH-----  
GKKR-----VHVIDFS-MNQG---LQWPALMQALALRE-----GGP-----P-----TFRLTGI-----  
GPPAPDN-----SDHLHEVGCKLAQLAEAIHVE-FEYRGFVAN-SLA-----DL-DA-----S-M---LEL-  
-RPSD---TEAVAVNSVFEHLKLL-----  
GRPGGIEKVLGVVQKIKPVI FTVVEQES-----NH-N-GPVFLDRFT-----ESLHYSTLFDLDA-EG-----VPNSQDK-----  
VMSEVYLGKQICNLV-AC---EGP--D---R---VE-RHETLSQ---WGNRFGS-SGLAPAHLGSNAPKQASMLLSVFNSSGQ-----YRV--  
---EES-NG-----CLMLGWHTRPLITTSAW  
>OsGRAS-13 .  
LRLHLLMAAAEALS GPHK---SRE-LARVILVR---L-KE---MVSHTASANAAA-----SNMERLAAHFTDA-LQGLLDG-SHP-----  
-----VGGSGRQAAAAASHHH-----AGDVLTA-FQMLQDMSPYMKFGHFTANQAI LEAVS-----  
GDRR-----VHIVDYD-IAEG---IQWASLMQAMTSRA-----DGVP---AP-----HLRITAVSRS-----  
GG-----G--GARAVQEAGRRLSFAFAASIGQP-FSFGQCRLD-SDE-----RF-RP-----A-T-----  
VRM--VKG---EALVANCVLHQAAAT-----TTIRRTG-----  
SVASFLSGMAALGAKLVTVVEE EGEAEKDDGDSAGDAA-AGGFVRQFM-----EELHRYSAVWDSL-EA-G---FPTQSRV-----  
RGLVERVILAPNIAGAV-----S---R-A-YRGVDGEGRCG---WGQWMRG-SGFTAVPLSFCFNHSQARLLLLGLF--NDG-----  
YTVE-----ETG-PN-----KIVLGWKARRLMSASVW  
>AtGRAS-23 .  
LRLVHLLVAAAADASTGANK---SRE-LTRVILAR---L-KD---LVS-----PGDR-----TNMERLAAHFTNG-LSKLE-----  
-----RDSVLCPPQHRD-----DVYDQADVISA-FELLQNMSPYVNFYLTATQAI LEAVK-----  
YERR-----IHIVDYD-INEG---VQWASLMQALVSRN-----TGPS---AQ-----HLRITALSRA-----  
TN-----GKKSVAAVQETGRRLTAFADSIGQP-FSYQHCKLD-TNA-----F-ST-----S-S-----  
LKL--VRG---EAVVINCLMLHLPFS-----HQTPS-----  
SVISFLSEAKTLNPKLVTLVHEE-----VGLMG-NQGFLYRFM-----DLLHQFSAIFDSL-EA-G---LSIANPA-----  
RGFVERVFIGPWVANWL-----T---RIT-ANDAEVESFAS---WPQWLET-NGFKPLEVSTNRCQAKLLLLSLF--NDG-----  
FRVE-----ELG-QN-----GLVLGWKSRRLVSASFVW  
>OsGRAS-6 .  
LCLIHLLLNCAAAAAGR-----LD-AANAALAH---I-AS---LAA-----PDGD-----A-MQRVAAAFAEA-LARRALR-AWP--GL--  
CRALLL-----PRASPTP-----AEVAAA-RRHFLDLCPPFLRLAGAAANQS I LEAME-----  
SEKI-----VHVIDLG-GADA---TQWLELHLLAARP-----EGP-----P-----HLRLTSV-----  
-----HEH-KELLTQTAMALTKEAERLDVP-FQFNP-VVS-RLD-----AL-DV-----E-S-----LRV-  
-KTG---EALAICSSLQLHCLLASDDD-----AAA-----VAGGDKERRSPESGLS---  
PSTSRADAF LGALWGLSPKVMVAEQEA-----SH-N-AGLTERFV-----EALNYAALFDCL-EV-G---AARGSVE-----  
RARVERWLLGEEIKNIV-AC---DGG--E---R---RE-RHERLER---WARRLEG-AGFGRVPLSYALLQARRVAQ-----  
GLGCDGFKVREE-----KG-----NFFLCWQDRALFSVASW  
>AtSCL3 .  
LYLIHLLLT CANHVASGS-----LQ-NANAAL EQ---L-SH---LAS---PDGD-----T-MQRIAA YFTEA-LANRILK-SWP--GL--  
YKALNA-----TQTRTNVNSEI IHV-RRLFFEMFPILKVS YLLTNRAI LEAME-----  
GEKM-----VHVIDLD-ASEP---AQWLALQAFNSRP-----EGP-----P-----HLRITGV-----  
-----HHQ-KEVLEQMAHRLIEEA EKLDIP-FQFNP-VVS-RLD-----CL-NV-----E-Q-----LRV-  
-KTG-----  
EALAVSSVLQHTFLASDDDLMRKNCALRFQNNPSGVLDLQRLVMMSHGSAEARENDMSNNNGYSPSGDSASSLPLPSSGRDTSFLNAIWGLSPKVMVVT  
EQDS-----DH-N-GSTLMERLL-----ESLYTYAALFDCL-ET-K---VPRTSQD-----RIKVEKMLFGEEIKNII-SC---EGF--  
E---R---RE-RHEKLEK---WSQRIDL-AGFNVPLSYAMQLQARRLLQ-----GCGFDGYRIKEE-----SG-----  
CAVICWQDRPLYSVSAW  
>OsGRAS-26 .  
VLMVSLRISIAAFLADGT-----CQM QVNDGLSC---V-VD---LAG-----GDADGGVGEGRS-AQRLASAFAEA-LALRFIL-PCD--GV--  
CRSLHL-----TRAPPPP-----AVSAA-RQGFRAMCPFVRLAAAAANLS IAEVME-----

AERA-----VVHVVDLGGGVDA-----NQWVELVRLVAARP-----GGP-----PG-----LLRLTVV-----  
-----NES-EDFLSAVAAYVAEAQRDLDS-LQFHP-VLS-SIE-----EL-SATATGSIGS-R-----LVV-  
-IPG-----QPLAVVANLQIHRLLAFFDY-----VD-----GVAS-----RRPAEQSGSSQHTMTT--  
ATKTKADALLRAIRDNLNPKLVLTENEA-----DH-N-VAELGARVW-----NALNYAALFDAL-EA-SSTPPAAVPPHE-----  
RACVERWVLGEEIKDIV-VR-----ETG-----R-----RE-RHETLGR---WAERMVA-AGFSPVTA-  
RALASTETLAQQMVAAGGGGAGAVLRAAHG-----GGC-----FPVICWCDVPVFSVSTW  
>OsGRAS-12 .  
GDLKQVIAACGKAVDENS-----WYRDLLISE--L-RN---MVS-----ISGE-----P-MQRLGAYMLEG-LVARLSS-TGH--AL--  
YKSLKC-----KEPTSFELMSY-MHLLYEICPFFKFGYMSANGAIAEAVK-----  
GENF-----VHIIDFQ-IAQG---SQWATMIQALAARP-----GGP-----P-----YLRITGI-----  
DDSNS----AHARGGLDIVGRRLFNIAQSCGLP-FEFNA-VPA-ASH-----EVMLE-----H-----LDI-  
-RSG----EVIVVNFAYQLHHTP-----DESVG-----  
IENHRDRILRMVKGLSPRVVTLVEQEA-----NT-N-TAPFFNRYL-----ETLDYYTAMFEAI-DV-A----CPRDDKK-----  
RISTEQHCVARDIVNLI-AC-----EGA--E-----R---VE-RHEPFGK---WRARLSM-AGFRPYPLSALVNNTIKKLLDSYHSY-----  
YKLEER-----DG-----ALYLGWKNRKLIVVSSAW  
>AtSCL13 .  
LDLKEVLVEAARAVADGD----FA-TAYGFLDV---L-EQ---MVS-----VSGS-----P-IQRLGTYMAEG-LRARLEG-SGS--NI--  
YKSLKC-----NEPTGRELSY-MSVLYEICPYWKFAYTTANVEILEAIA-----  
GETR-----VHIIDFQ-IAQG---SQYMFLIQLAKRP-----GGP-----P-----LLRVTGV-----  
DDSQS----TYARGGGLSLVGERLATLAQSCGVP-FEFHDAIMS-----GCKVQRE-----H-----LGL-  
-EPG----FAVVVNFYVVLHHP-----DESVS-----  
VENHRDRLLHLIKSLSPKLVTLVEQES-----NT-N-TSPFLSRFV-----ETLDYYTAMFESI-DA-A----RPRDDKQ-----  
RISAEQHCVARDIVNMI-AC-----EES--E-----R---VE-RHEVLGI---WRVRMM-AGFTGWVSTSAFAAASEMLKAYDKN-----  
YKLGGH-----EG-----ALYLFWKRRPMATCSVW  
>OsGRAS-2 .  
VDLETLIHCQAQSVATDD----RR-SATELLKQ---I-RQ---HAH---ANGD-----G-DQRLAHCFFANG-LEARLAG-TGS--QI--  
YKNYTI-----TRLPCTDVLKA-YQLYLAACPFFKISHYFANQTI LNAVE-----  
KAKK-----VHIVDYG-IYYG---FQWPCLIQRLSNRP-----GGP-----P-----KLRIITGI-----  
DTPQP---GFRPAERTEETGRYLSDYAQTFNVP-FEFQA-IAS-RFE-----AVRME-----D-----LHI-  
-EED---EVLIVNMFKFKNLN-----DESVVAE-----  
SPRNMALKTIRKMNPHVFIHGVVNG-----SY-N-APFFVTRFR-----EALFHYSALFDML-ET-N----IPKDNEQ-----  
RLLESALFSREAINVI-SC-----EGL--E-----R---ME-RPETYKQ---WQVRNQR-VGFKQLPLNQDMMKRAREKVR-CYHKD-----  
FII-----DED-NR-----WLLQGWKGRILFALSTW  
>OsGRAS-46 .  
VDLHTLIHCAQAVATSD----RR-SATELLKQ---I-KQ---NSS-----ARGD-----A-TQRLACCFAEG-LEARLAG-TGS--QV--  
YKSLVA-----KCTSTVDLKA-YKLFAAACCIKVSFIFSNKTI L DAVA-----  
GRRK-----LHIVDYG-LSYG---FQWPGLPKCLSERE-----GGP-----P-----EVRIITGI-----  
DFPQP---GFRPADQIEETGRRLSNCARQFGVP-FRFQA-IAA-KWE-----TVRRE-----D-----  
LHLDREEEEEEEVVLVNVNCLHFLNALQ-----DESVVVD--  
SPSPRDMVLNNIRDMPHVQCVVNG-----AY-G-APFFLTRFR-----ETLFFYSQFDML-DA-T----IPRDNDE-----  
RLLIERDILGRWALNVI-AC-----EGA--D-----R---VD-RPETYKQ---WLVNRH-AGLTQLPLQPQVVELVRDKVKKLYHKD-----  
FVI-----DVD-HN-----WLLQGWKGRILYAMSTW  
>OsGRAS-48 .  
VDLHNLHCAQAVATSD----RR-SATELLKQ---I-KQ---HSS-----AWGD-----A-GQRLAHCFAEQ-LEARLAG-TGS--QV--  
YQSLMS-----QRTSVVDFLKA-YRLYMEACCKKVAVFVSNKTI Y DAVA-----  
GRRK-----LHIVDYG-LSYG---FQWPGLRELAARR-----GGP-----P-----EVRIITGI-----  
DLPQP---GFRPDQIEETGRRLSRYADELQVP-FKFGH-IAATKKE-----SVRRE-----E-----LGE-  
AEED---EVLVVISLCHFRNVM-----DESLQED-  
SSRSPRDEVLGNIRMRPDMVFIHGIMNG-----AY-G-ATYFLTRFR-----EALYAAAQFDLL-DA-T----VGRESHE-----  
RMLVERDIFGRAALNVI-AC-----EGA--E-----R---VE-RPEMYKQ---WQARNQR-AGLRQLPLNPQVVRVLVDKVRDKYHKD-----  
FVV-----DED-QR-----WLLHRWKGRVLYALSTW  
>AtGRAS-1 .  
VDFRLLTLCAQSVSAGDKI-----TADDLLRQ---I-RK---QCS-----PVGD-----A-SQRLAHFFANA-LEARLEGSTGT--  
MIQSYDSISS-----KKRTAAQILKS-YVFLSASPFTLIYFFSNKMI L DAAK--  
-----DASV-----LHIVDFG-ILYG---FQWPFIQHLSKSN-----PGLR-----KLRIITGI-----  
-----EIPQH---GLRPTERIQDTGRRLTEYCKRFGVP-FEYNA-IASKNWE-----TIKME-----E-----  
-FKI--RPN---EVLAVNAVLRFKNLR---DVI-----PG-----  
EEDCPRDGFLKLIRDMNPNVFLSSTVNG-----SF-N-APFFTTRFK-----EALFHYSALFDLF-GA-T----LSKENPE-----  
RIHFEGEFYGREVMNVI-AC-----EGV--D-----R---VE-RPETYKQ---WQVRMIR-AGFKQKQVVEAELVQLFREKMKKWGYHKD-----  
FVL-----DED-SN-----WFLQGWKGRILFSSSCW  
>AtSHR .  
KWADSVLLEAARAFSDKD----TA-RAQQILWT---L-NE---LSS-----PYGD-----T-EQKLASYFLQA-LFNRTG-SGER-----  
CYRTMVTAAA-T-----EKTCSEFSTRKT-VLKFQEVSPWATFGHVAANGAILEAVD-----  
-GEAK-----IHIVDIS-----S-TFCTQWPTLLEALATRS-D-----DTP-----HLRLTTVVVA-----  
NKFVND-----QTASHRMKEIGNRMEKFARLMGVP-FKFNI-IHH-----VGDLEF-----DL-NE-----  
LDV--KPD---EVLAINCVGAMHGIA-----  
SRGSPRDAVISSFRRLRPRIVTVVEEADLVE-----EEGFDDEFLRGFG-----ECLRWFRCFESW-EE-S---FPRTSNE-----  
RLMLERA-AGRAIVDLV-AC-----EPS--D-----S---TE-RRETARK---WSRRMRN-SGFGAVGYSDEVADVRALLRRYKEG-----  
WSMVQCP---DAA-----GIFLCWRDQPVVWASAW  
>OsGRAS-15 .  
RWAAQLMECARAVAGRD----SQ-RVQQLMWM---L-NE---LAS-----PYGD--V-----DQKLASYFLQG-LFARLTT-SGPR-----  
TLRTLATASD-----RNASFDSTRRT-ALKFQELSPWTFPGHVAANGAILESFLA--  
AAAGAAASSSSSSSTPPTRLHILDLS-----NTFCTQWPTLLEALATRSSD-----DTP-----HLSITTVV-----  
-----PTAAP--SAAQVRMREIQRLKFAFLMGVP-FSFRA-VHH-----SGDLADL-----DL-----A-A-----  
LDL--REGG--ATAALAVNCVNALRGVA-----  
RGRDAFVASLRRLEPRVTVVVEEADLAAPEAD-ASSEADTDAAFVKVFG-----EGLRFFSAYMDSL-EE-S---FPKTSNE-----RLSLERA-  
VGRAIVDLV-SC---PAS--Q---S---AE-RRETAAS---WARRMRS-AGFSPAAFSEVDVRSLLRRYKEG-----  
WSMRDAGGATDDA-AG-----AAAAGFLAWKEQPVVWASAW

```

>AtGRAS-14 .
SVIEQLFNAAELIGTTGNNNGDHTVLAQGILAR---L-NHH-LNTSS-----NHKS-----P-FQRAASHIAEA-LLSLIHN-----
-----ESSPLITPENLILR-----IAA-YRSFSETSPFLQFVNFTANQSIILESCNES-----
GFDR-----IHIIDFD-VGYG---GQWSSLMQELASGV-----GRRR--NRAS-----SLKLTVF-----
APPS---TVSDEFELRFTTEENLKTFAEVKIP-FEIEL-LSV-----EL-----LLNPAY--WPLSL-
-RSSE--KEAIAVNLV-----NSVAS-----
GYLPLILRFLKQLSPNIVVCSDRGC-----DR-N-DAPFPNAVI-----HSLQYHTSLLLES-DA-N-----QNQDDSS-----
IERFWVQPSIEKLL-----M---K-----RHRWIERS-PPWRILFTQ-CGFSPASLSQMAEAQAECLLQR-----N--
PVRGFHVVEKR-----QS-----SLVMCWQRKELVTVSAW
>AtSCL15 .
EDFIEDLIRVDCVESDE-----LQ-LAQVVLSR---L-NQ---RLRS-----PAGR-----P-LQRAAFYFKEA-LGSFLTG-----
-----SNRNPIRLSSW-----SEIVQRIRA-IKEYSGISPIPLFSHFTANQAILDLSL-----
SQSSS-----PF--VHVVDVE-IGFG---GQYASLMREITEKSV-----SGG-----FLRVTAUV-----
-----AEECAVETRLVKENLTQFAAEMKIR-FQIEF-VLMKTFE-----ML-----SFK---AIRF-
-VEG-----ERTVVLISPAIFRRL-----
SGITDFVNNLRVSPKVVVFDSEG-----WTEIAG-SGSFRREFV-----SALEYTMVLES-DA-A---APPGLV-----
KKIVEAFVLRPKISA AV-----ETAA-D---R-----RHTGEMT---WREAFCA-AGMRPIQLSQFADFQAECLLEKAQ-----
VRGFHVAKR-----QG-----ELVLCWHGRALVATSAW
>OsGRAS-45 .
DSLSDLLLAGAEAVEAGDSI-----LASVAFSR---L-DD---FLS--GIPENGA-----ASSFDRLAYHFDQ-LSRSMSS-AST-----
-----GCYQPEPLPSGNMLV-----HQIIQELSPFVKFAHFTTNQAILDAI-----
GDMD-----VHVVDLN-IGEG---IQWSSLSMDLAR-----CGGK-----SFRLTAITTY-----
-----ADCHASTHTVRLLESEFADSLLELP-FQYNS-ICV-HNED-----EL-HAFFEDCKGS-----VIV-
-SCD---TTSMYKSLSTLQSSL-----
LVCVKLQPKLVVTIEEDL---VRIGG---VSP-S-SASFVEFFF-----EALHHTTVFESM---ASC--FIGSSYE----
PCLRLVEMELLPRIQDFV---VKYGSV-----RVEANASEVL-----EGFMACELSACNIAQARMLVGLFN-----
RVFGVVE-----KG-----RLALCWKSRPLISVSVW
>OsGRAS-8 .
QQLDELAAAAKATEAGNSV-----GAREILAR---L-NQ---QLP-----PLGK-----P-FLRSASYLREA-LLLALAD-SHH--GV-----
-----SSVTP-----LDVALKLA-A-YKSFSDLSPVLQFANFTATQALLDEIG-----
GTAT-----SCIHVIDFD-LGVG---GQWASFLQELAHHRAA-----GGVTL---P-----LLKLTAFVST-----
-----ASHHPLELHLTQDNLSQFAADLGIP-FEFNA-VSLDAFN-----PG-----EL--I-----S-----
-STGD---EVVAVSLPVGCSARA-----
PPLPAILRLVKQLSPKIVVAIDHGA-----DR-A-DLSFSQHFL-----NCFQSCVFLDLSL-DA-AG---IDADSAC-----
KIERFLIQPRVHDMV---L-G-----RHKVHKA--IAWRSVFAA-AGFKPVPSPNLAEAQADCLLKRQV---VR-----
GFHVEK-----CG-----AALTLYWQRGELVSISSW
>OsGRAS-14 .
RWAEQLLNPCAVAVEAGN---LS-RVQHLYFYV---L-GE---LES---FSGD-----A-NHRLAAHGLRA-LARWLPA-----AVGP-----
---AA-AAV-----RVPPCSEPTTAFAA-----AEPRLFRAS-LIRFHEVSPWFALPNALANAAIAQASTCG--
AAGATPR-----PLHVVDLG-VSHG---VQWPTLLES-TRQP-----GGRA---PP-----SVRLTVVG---P-
GATATSPVAPFSASPPGYD-----FSPHLLRYAKSINLD-LRIS-----R-----AA-----TL-DD---A-----
---VPG---DDG---EALVVCLQFRLLGHA-----AEE-----
RREVLKARKGLNPELVVL---SEL-----DS-G-VGVVGGDGG-----SAAGEFAARLELL-WR-F---LESTSAAFKGDV---
EERRLEAEAGAILAADVAAGE--G---R-----EG---WRERMAA-AGFEEAPFGAEAVESARSLLRKYDSE-----
WEMSAP---SPA-AA-----AVALRWKQPVVFCSLW
>AtGRAS-16 .
RWAEKLLNPCALAITASN---SS-RVQHLYCV---L-SE---LAS---SSGD-----A-NRRLAAGFLRA-LQHHLSS---S-SVS-----
-----SSFVPVTFAS-----AEVKMFQKT-LLKFYEVS PWFALPNMANSAILQILAQDP-----
KDKK-----D-LHIIDIG-VSHG---MQWPTLLEALSCLL-----EGPP---P-----RVRITVISDL-----
TADIFPSVGPYPGYN-----YGSLLGFARSLKIN-LQIS---VLD-----KL-----QL-----
IDT--SPH---ENLIVCAQFRLHHLK-----H--
SINDERGETLKAVRSIRPKGVVLCENNGE-----CSS---SADFAAGFS-----KKLEYVVKFLDST-SS-G---FKEENSE-----
ERKLMGEATKVLNAGDMNEGK--E---K-----WYERMRE-AGFFVEAFEDAVDGAKSLLRKYDNN-----WEIRME-----
---DG-----DTFAGLMWKGEAVSFCSLW
>OsGRAS-22 .
TTSRQLLSEAAAAIADGH---NE-TAATHLTA---L-KR---AAN-----SRGD---V-----EQRLVAMVAA-LSSRIGQ-TASVPDICG---
-----GETRAG-SQLLHDISPFCRLALHAANVAIVDAV-----
GDHRA---IHLVDFD-VSAP-----QHADLIRCLAARRL-----PGT-----SLKVTAV-----
TDPASPF--TQSVTATLH---LQKLAERAGID-YRFKM-VSC-----RAG-----EI-EA-----S-K---LGC-
-EAG---EALAVNLAFALSHVP-----DESVS-----
PANPRDEILRRVRALGPQVVALVEQEL-----NS-N-TAPLTTRFT-----DACAHYGAILESL-DA-T---IPRESAE-----
RARAEAA-LGGRAANAV-AR---EGA--D---R---LE-RCEVFGK---WRSRFGM-AGFRPVALGPGIADQVLARQGPVAAG-----
FAVKAE-----NG-----VLRGWMGRVVTVASAW
>AtSCL8 .
VCSRQTVMEIATAIAEGK---TE-IATEILAR---V-SQ---TPNL---ERNS-----EKLVDVMVAA-LRSRIAS-----PV-----
-----TELYGKEHLIS-TQLLYELSPCFKLGFEAANLAILDAADNND---
GMMI-----PHVIDFD-IGEG---GQYVNNLRTLSTRR-----NGKSQSQNSP-----VVKITAVANNVYGLV---
-----DDGGEERLKAAGDLSQLGDRLGIS-VSFNV-VTSLRLG-----DLNRE-----S-----LGC-
-DPD---ETLAVNLAFKLYRVP-----DESV-----
TENPRDELRRVKGLKPRVTVLVEQEM-----NS-N-TAPFLGRVS-----ESCAPYGALESV-ES-T---VPSTNSD-----
RAKVEEG-IGRKLNAV-AC---EGI--D---R---IE-RCEVFGK---WRMRMSM-AGFELMPLSEKIAESMKSGRGNRVHPG-----
FTVKED-----NG-----GVCFGWMGRALTVASAW

```

The entire GRAS sequence was used for the alignment while the sequences upstream and downstream of the conserved LHRI and SAW domains, respectively, have been removed.

**Figure S5. Phylogenetic reconstruction revealed the absent of ERAMOSA in legumes.**

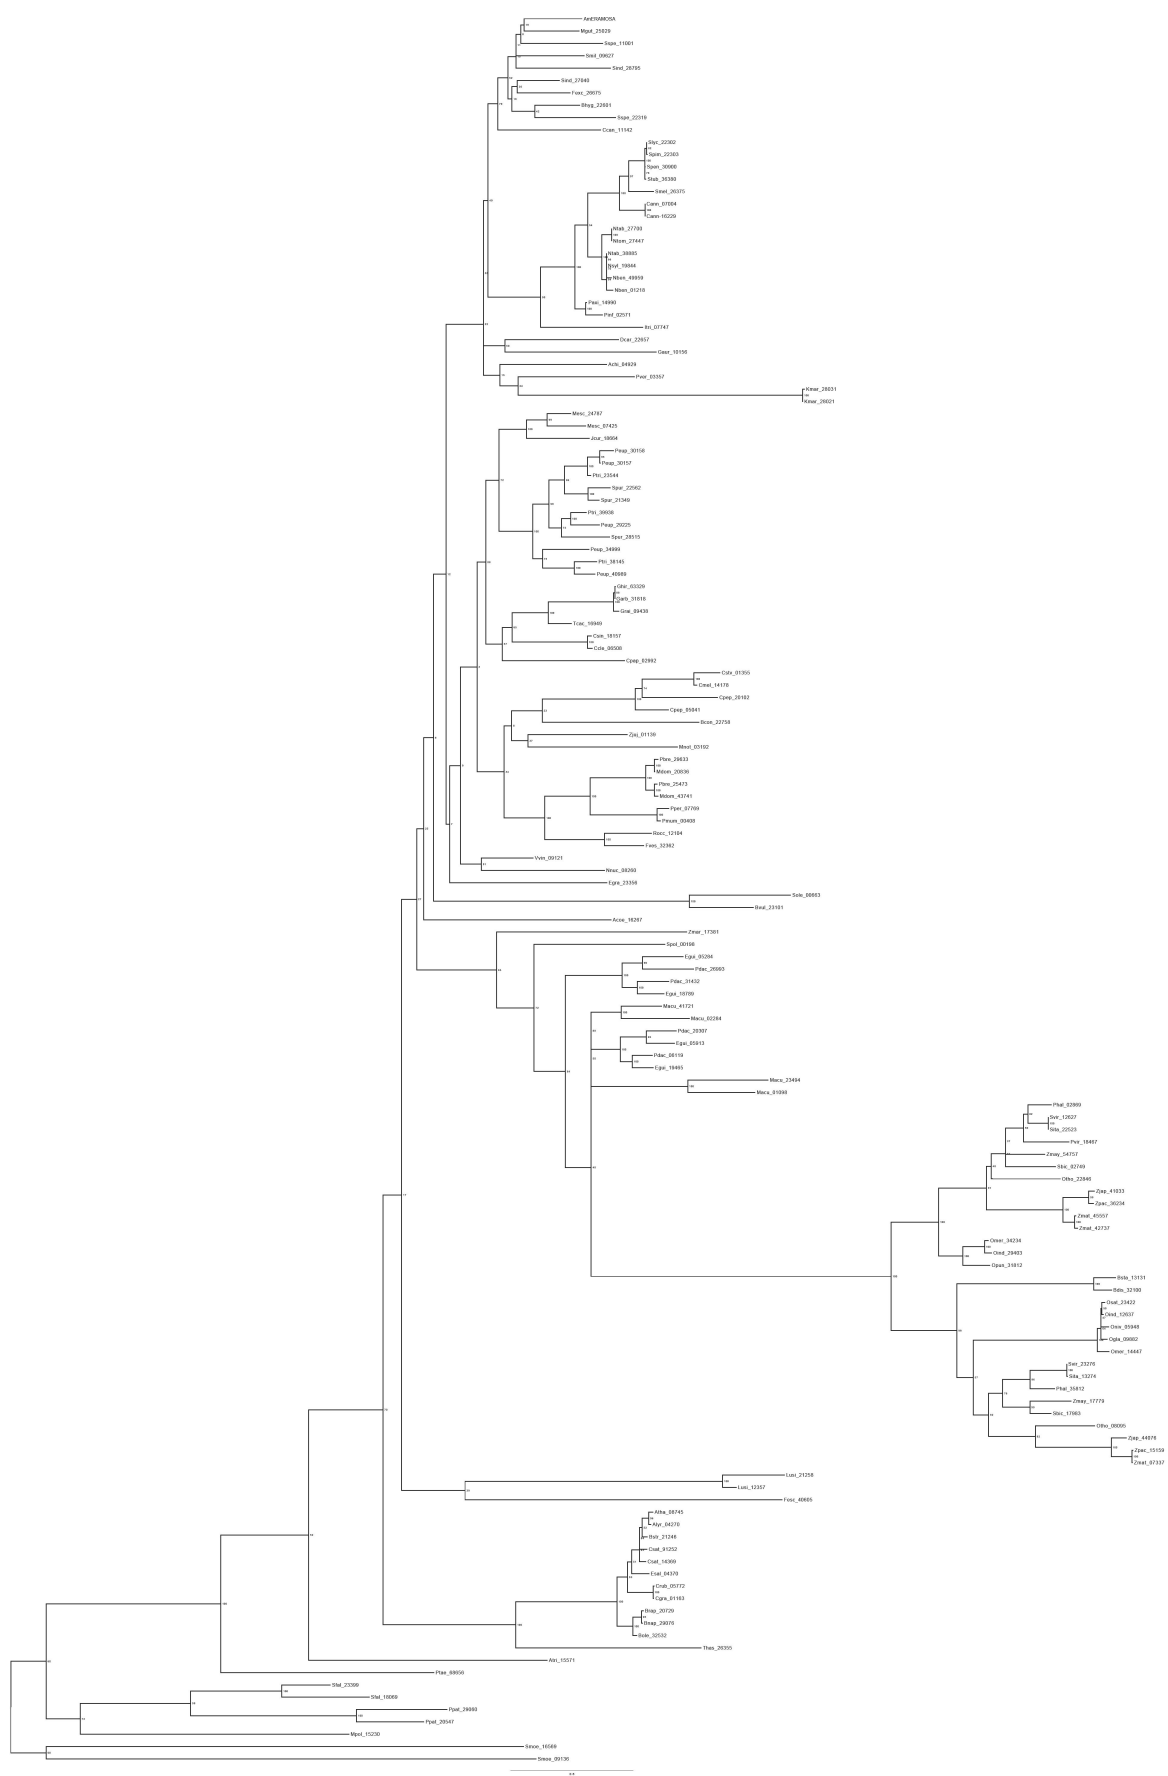

Phylogenetic tree containing all available ERAMOSAs orthologues verifies that ERA cannot be found in the Leguminosae family. In order to avoid an ungainly tree, genes similar to ERA have not been included in the analysis. The phylogenetic tree has been constructed using PhyML software; the scale bar indicates number of substitutions per site.

**Table S1.** List of primers used in this study.

| Primers            |            | Sequence                                                      |
|--------------------|------------|---------------------------------------------------------------|
| Degenerate primers | OL135-ERAf | 5'-CARTGGCCNCCNYTNATGCA-3'                                    |
|                    | OL136-ERAr | 5'-TGRTTYTGCCANCCNARRAA-3'                                    |
| Genotyping         | Am1-f      | 5'-ACAAGCCATCCACATACTCG-3'                                    |
|                    | Am2-WTr    | 5'-AACACCGCCGCGTAATGATC-3'                                    |
|                    | Am9-mutr   | 5'-TCTTGGGACATAGGTTTTATGCGACAGAT-3'                           |
| Semi-Q RT-PCR      | Am7-ERAf   | 5'-TGAAGAAGCCCTACTTCAGTCC-3'                                  |
|                    | Am12-ERAr  | 5'-TCGAGTATGTGGATGGCTTG-3'                                    |
|                    | Ve21-ACTf  | 5'-GCCAAAGCAGTGATCTCTTTGCTC-3'                                |
|                    | Ve33-ACTr  | 5'-CACTCCTGCCATGTATGTCGCTAT-3'                                |
| In situ            | Am1-ERAf   | 5'-ACAAGCCATCCACATACTCG-3'                                    |
|                    | Am2-ERAr   | 5'-AACACCGCCGCGTAATGATC-3'                                    |
|                    | Am5-ERAr   | 5'-taatacactactatagggAACACCGCCGCGTAATGATC-3'                  |
|                    | Am39-STMf  | 5'-TCTCAACAAGGGTTTTTCAGAC-3'                                  |
|                    | Am40-STMr  | 5'-GCTGCTTCTTCTAGCCTCGA-3'                                    |
|                    | Am41-STMr  | 5'-taatacactactatagggGCTGCTTCTTCTAGCCTCGA-3'                  |
| Cloning            | Am59-ERAf  | 5'-ggggacaagttgtacaaaaaagcaggcttcATGTTGGGCAGCTCATTTGG-3'      |
|                    | Am60-ERAr  | 5'-ggggaccactttgtacaagaaagctgggtTCAGTGCCACGAAGAAACCG-3'       |
|                    | Am67-INCOF | 5'-ggggacaagttgtacaaaaaagcaggcttcATGGCTAGGGAGAAGATCCAGATC-3'  |
|                    | Am68-INCOF | 5'-ggggaccactttgtacaagaaagctgggtTCAGTTTCAGCCAGAGTATGG-3'      |
|                    | Am69-SQUAf | 5'-ggggacaagttgtacaaaaaagcaggcttcATGGGGAGAGGGAAAGTACAACCTG-3' |
|                    | Am70-SQUAr | 5'-ggggaccactttgtacaagaaagctgggtTCATGCAGCAAAGCATCCAAGATG-3'   |



**Table S2.** Locus/sequence ID of LATERAL SUPPRESSOR sequences used for the construction of the phylogenetic tree in Fig. 5.

|                  | Clade       | Subfamily | Species                           | Locus/sequence ID                                  | Database                  | References |
|------------------|-------------|-----------|-----------------------------------|----------------------------------------------------|---------------------------|------------|
| <b>Ppat Ls1</b>  | <i>Ls</i>   | <i>Ls</i> | <i>Physcomitrella patens</i>      | Pp1s116_166V6                                      | Phytozome                 |            |
| <b>Ppat Ls2</b>  | <i>Ls</i>   | <i>Ls</i> | <i>Physcomitrella patens</i>      | Pp1s240_118V6                                      | Phytozome                 |            |
| <b>Ppat SCL4</b> | <i>SCL4</i> | <i>Ls</i> | <i>Physcomitrella patens</i>      | Pp1s362_33V6                                       | Phytozome                 |            |
| <b>Sm Ls1</b>    | <i>Ls</i>   | <i>Ls</i> | <i>Selaginella moellendorffii</i> | scaffold_17:651,163..652,533 (reverse orientation) | Phytozome                 |            |
| <b>Sm Ls2</b>    | <i>Ls</i>   | <i>Ls</i> | <i>Selaginella moellendorffii</i> | 84560                                              | Phytozome                 |            |
| <b>Sm SCL4-1</b> | <i>SCL4</i> | <i>Ls</i> | <i>Selaginella moellendorffii</i> | scaffold_78:396,615..398,099                       | Phytozome                 |            |
| <b>Sm SCL4-2</b> | <i>SCL4</i> | <i>Ls</i> | <i>Selaginella moellendorffii</i> | 122435                                             | Phytozome                 |            |
| <b>Paqu Ls</b>   | <i>Ls</i>   | <i>Ls</i> | <i>Pteridium aquilinum</i>        | EST_lrc34288                                       |                           | 2          |
| <b>Pa Ls</b>     | <i>Ls</i>   | <i>Ls</i> | <i>Picea abies</i>                | MA_10255g0010                                      | Congenie.org              |            |
| <b>Pa SCL4</b>   | <i>SCL4</i> | <i>Ls</i> | <i>Picea abies</i>                | MA_10435790g0010                                   | Congenie.org              |            |
| <b>Atri Ls</b>   | <i>Ls</i>   | <i>Ls</i> | <i>Amborella trichopoda</i>       | AmTr_v1.0_scaffold00061.21                         | Amborella Genome Database |            |
| <b>Atri SCL4</b> | <i>SCL4</i> | <i>Ls</i> | <i>Amborella trichopoda</i>       | AmTr_v1.0_scaffold00059.32                         | Amborella Genome Database |            |
| <b>Pd Ls1</b>    | <i>Ls</i>   | <i>Ls</i> | <i>Phoenyx dactylifera</i>        | PDK_30s827291c009                                  |                           | 3          |
| <b>Pd Ls2</b>    | <i>Ls</i>   | <i>Ls</i> | <i>Phoenyx dactylifera</i>        | PDK_30s722381c002                                  |                           | 3          |
| <b>Pd Ls3</b>    | <i>Ls</i>   | <i>Ls</i> | <i>Phoenyx dactylifera</i>        | PDK_30s772531c007                                  |                           | 3          |
| <b>Ma Ls1</b>    | <i>Ls</i>   | <i>Ls</i> | <i>Musa acuminata</i>             | GSMUA_Achr1G09360_001                              | Genoscope/Cirad           |            |
| <b>Ma Ls2</b>    | <i>Ls</i>   | <i>Ls</i> | <i>Musa acuminata</i>             | GSMUA_Achr7G16880_001                              | Genoscope/Cirad           |            |
| <b>Ma Ls3</b>    | <i>Ls</i>   | <i>Ls</i> | <i>Musa acuminata</i>             | GSMUA_Achr1G19470_001                              | Genoscope/Cirad           |            |
| <b>Ma Ls4</b>    | <i>Ls</i>   | <i>Ls</i> | <i>Musa acuminata</i>             | GSMUA_AchrUn_randomG25630_001                      | Genoscope/Cirad           |            |
| <b>Ma SCL4-1</b> | <i>SCL4</i> | <i>Ls</i> | <i>Musa acuminata</i>             | GSMUA_Achr3G30530_001                              | Genoscope/Cirad           |            |
| <b>Ma SCL4-2</b> | <i>SCL4</i> | <i>Ls</i> | <i>Musa acuminata</i>             | GSMUA_AchrUn_randomG22160_001                      | Genoscope/Cirad           |            |
| <b>Ma SCL4-3</b> | <i>SCL4</i> | <i>Ls</i> | <i>Musa acuminata</i>             | GSMUA_Achr4G07320_001                              | Genoscope/Cirad           |            |
| <b>Os MOC1</b>   | <i>Ls</i>   | <i>Ls</i> | <i>Oryza sativa</i>               | LOC_Os06g40780                                     | Phytozome                 | 4          |
| <b>OsGRAS-7</b>  | <i>Ls</i>   | <i>Ls</i> | <i>Oryza sativa</i>               | LOC_Os02g10360                                     | Phytozome                 | 5          |
| <b>OsGRAS-19</b> | <i>SCL4</i> | <i>Ls</i> | <i>Oryza sativa</i>               | LOC_Os03g51330                                     | Phytozome                 | 5          |
| <b>Ac Ls</b>     | <i>Ls</i>   | <i>Ls</i> | <i>Aquilegia coerulea</i>         | Aquca_045_00170                                    | Phytozome                 |            |

|                  |             |           |                            |                                 |           |  |
|------------------|-------------|-----------|----------------------------|---------------------------------|-----------|--|
| <b>Ac SCL4-1</b> | <i>SCL4</i> | <i>Ls</i> | <i>Aquilegia coerulea</i>  | Aquca_010_00478                 | Phytozome |  |
| <b>Ac SCL4-2</b> | <i>SCL4</i> | <i>Ls</i> | <i>Aquilegia coerulea</i>  | Aquca_013_00373                 | Phytozome |  |
| <b>Vv Ls</b>     | <i>Ls</i>   | <i>Ls</i> | <i>Vitis vinifera</i>      | GSVIVG01014862001               | Phytozome |  |
| <b>Vv SCL4</b>   | <i>SCL4</i> | <i>Ls</i> | <i>Vitis vinifera</i>      | GSVIVG01018975001               | Phytozome |  |
| <b>Rc Ls</b>     | <i>Ls</i>   | <i>Ls</i> | <i>Ricinus communis</i>    | 28966.t000014                   | Phytozome |  |
| <b>Rc SCL4</b>   | <i>SCL4</i> | <i>Ls</i> | <i>Ricinus communis</i>    | 29634.t000102                   | Phytozome |  |
| <b>Me Ls1</b>    | <i>Ls</i>   | <i>Ls</i> | <i>Manihot esculenta</i>   | cassava4.1_022846m.g            | Phytozome |  |
| <b>Me Ls2</b>    | <i>Ls</i>   | <i>Ls</i> | <i>Manihot esculenta</i>   | cassava4.1_022511m.g            | Phytozome |  |
| <b>Me SCL4-1</b> | <i>SCL4</i> | <i>Ls</i> | <i>Manihot esculenta</i>   | cassava4.1_003937m.g            | Phytozome |  |
| <b>Me SCL4-2</b> | <i>SCL4</i> | <i>Ls</i> | <i>Manihot esculenta</i>   | cassava4.1_003952m.g            | Phytozome |  |
| <b>Lu Ls1</b>    | <i>Ls</i>   | <i>Ls</i> | <i>Linum usitatissimum</i> | Lus10032882.g                   | Phytozome |  |
| <b>Lu Ls2</b>    | <i>Ls</i>   | <i>Ls</i> | <i>Linum usitatissimum</i> | Lus10027123.g                   | Phytozome |  |
| <b>Lu SCL4-1</b> | <i>SCL4</i> | <i>Ls</i> | <i>Linum usitatissimum</i> | Lus10041740.g                   | Phytozome |  |
| <b>Lu SCL4-2</b> | <i>SCL4</i> | <i>Ls</i> | <i>Linum usitatissimum</i> | Lus10024014.g                   | Phytozome |  |
| <b>Pt Ls1</b>    | <i>Ls</i>   | <i>Ls</i> | <i>Populus trichocarpa</i> | Potri.001G473200                | Phytozome |  |
| <b>Pt Ls2</b>    | <i>Ls</i>   | <i>Ls</i> | <i>Populus trichocarpa</i> | Potri.015G008300                | Phytozome |  |
| <b>Pt Ls3</b>    | <i>Ls</i>   | <i>Ls</i> | <i>Populus trichocarpa</i> | Potri.012G020200                | Phytozome |  |
| <b>Pt SCL4-1</b> | <i>SCL4</i> | <i>Ls</i> | <i>Populus trichocarpa</i> | Potri.007G026300                | Phytozome |  |
| <b>Pt SCL4-2</b> | <i>SCL4</i> | <i>Ls</i> | <i>Populus trichocarpa</i> | Potri.005G123800                | Phytozome |  |
| <b>Mt SCL4</b>   | <i>SCL4</i> | <i>Ls</i> | <i>Medicago truncatula</i> | Medtr4g077760 and Medtr4g077750 | Phytozome |  |
| <b>Pv SCL4</b>   | <i>SCL4</i> | <i>Ls</i> | <i>Phaseolus vulgaris</i>  | Phvul.011G020600                | Phytozome |  |
| <b>Gm SCL4-1</b> | <i>SCL4</i> | <i>Ls</i> | <i>Glycine max</i>         | Glyma12g02060                   | Phytozome |  |
| <b>Gm SCL4-2</b> | <i>SCL4</i> | <i>Ls</i> | <i>Glycine max</i>         | Glyma11g09761                   | Phytozome |  |
| <b>Cs Ls</b>     | <i>Ls</i>   | <i>Ls</i> | <i>Cucumis sativus</i>     | Cucsa.041490                    | Phytozome |  |
| <b>Cs SCL4-1</b> | <i>SCL4</i> | <i>Ls</i> | <i>Cucumis sativus</i>     | Cucsa.201400                    | Phytozome |  |
| <b>Cs SCL4-2</b> | <i>SCL4</i> | <i>Ls</i> | <i>Cucumis sativus</i>     | Cucsa.127390                    | Phytozome |  |
| <b>Pp Ls</b>     | <i>Ls</i>   | <i>Ls</i> | <i>Prunus persica</i>      | ppa025834m.g                    | Phytozome |  |
| <b>Pp SCL4</b>   | <i>SCL4</i> | <i>Ls</i> | <i>Prunus persica</i>      | ppa003124m.g                    | Phytozome |  |
| <b>Fv Ls</b>     | <i>Ls</i>   | <i>Ls</i> | <i>Fragaria vesca</i>      | gene01184-v1.0-hybrid           | Phytozome |  |
| <b>Fv SCL4</b>   | <i>SCL4</i> | <i>Ls</i> | <i>Fragaria vesca</i>      | gene14780-v1.0-hybrid           | Phytozome |  |

|                                |             |           |                             |                          |           |     |
|--------------------------------|-------------|-----------|-----------------------------|--------------------------|-----------|-----|
| <b>Md Ls1</b>                  | <i>Ls</i>   | <i>Ls</i> | <i>Malus domestica</i>      | MDP0000159341            | Phytozome |     |
| <b>Md Ls2</b>                  | <i>Ls</i>   | <i>Ls</i> | <i>Malus domestica</i>      | MDP0000389025            | Phytozome |     |
| <b>Md SCL4-1</b>               | <i>SCL4</i> | <i>Ls</i> | <i>Malus domestica</i>      | MDP0000256486            | Phytozome |     |
| <b>Md SCL4-2</b>               | <i>SCL4</i> | <i>Ls</i> | <i>Malus domestica</i>      | MDP0000575908            | Phytozome |     |
| <b>At LAS</b>                  | <i>Ls</i>   | <i>Ls</i> | <i>Arabidopsis thaliana</i> | AT1G55580                | Phytozome | 6   |
| <b>At SCL4<br/>(AtGRAS-32)</b> | <i>SCL4</i> | <i>Ls</i> | <i>Arabidopsis thaliana</i> | AT5G66770                | Phytozome | 5,7 |
| <b>At SCL7<br/>(AtGRAS-19)</b> | <i>SCL4</i> | <i>Ls</i> | <i>Arabidopsis thaliana</i> | AT3G50650                | Phytozome | 5,7 |
| <b>Cr Ls</b>                   | <i>Ls</i>   | <i>Ls</i> | <i>Capsella rubella</i>     | Carubv10011270m.g        | Phytozome |     |
| <b>Cr SCL4-1</b>               | <i>SCL4</i> | <i>Ls</i> | <i>Capsella rubella</i>     | Carubv10016973m.g        | Phytozome |     |
| <b>Cr SCL4-2</b>               | <i>SCL4</i> | <i>Ls</i> | <i>Capsella rubella</i>     | Carubv10017026m.g        | Phytozome |     |
| <b>Es Ls</b>                   | <i>Ls</i>   | <i>Ls</i> | <i>Eutrema salsugineum</i>  | Thhalv10011480m.g        | Phytozome |     |
| <b>Es SCL4-1</b>               | <i>SCL4</i> | <i>Ls</i> | <i>Eutrema salsugineum</i>  | Thhalv10003860m.g        | Phytozome |     |
| <b>Es SCL4-2</b>               | <i>SCL4</i> | <i>Ls</i> | <i>Eutrema salsugineum</i>  | Thhalv10011122m.g        | Phytozome |     |
| <b>Cp Ls</b>                   | <i>Ls</i>   | <i>Ls</i> | <i>Carica papaya</i>        | evm.TU.supercontig_12.48 | Phytozome |     |
| <b>Cp SCL4</b>                 | <i>SCL4</i> | <i>Ls</i> | <i>Carica papaya</i>        | evm.TU.supercontig_6.108 | Phytozome |     |
| <b>Gr Ls</b>                   | <i>Ls</i>   | <i>Ls</i> | <i>Gossypium raimondii</i>  | Gorai.004G034900         | Phytozome |     |
| <b>Gr SCL4-1</b>               | <i>SCL4</i> | <i>Ls</i> | <i>Gossypium raimondii</i>  | Gorai.008G068100         | Phytozome |     |
| <b>Gr SCL4-2</b>               | <i>SCL4</i> | <i>Ls</i> | <i>Gossypium raimondii</i>  | Gorai.003G015400         | Phytozome |     |
| <b>Tc Ls</b>                   | <i>Ls</i>   | <i>Ls</i> | <i>Theobroma cacao</i>      | Thecc1EG030498           | Phytozome |     |
| <b>Tc SCL4</b>                 | <i>SCL4</i> | <i>Ls</i> | <i>Theobroma cacao</i>      | Thecc1EG000399           | Phytozome |     |
| <b>Eg Ls</b>                   | <i>Ls</i>   | <i>Ls</i> | <i>Eucalyptus grandis</i>   | Eucgr.F01978             | Phytozome |     |
| <b>Eg SCL4</b>                 | <i>SCL4</i> | <i>Ls</i> | <i>Eucalyptus grandis</i>   | Eucgr.I02451             | Phytozome |     |
| <b>Csi Ls</b>                  | <i>Ls</i>   | <i>Ls</i> | <i>Citrus sinensis</i>      | orange1.1g048299m.g      | Phytozome |     |
| <b>Csi SCL4</b>                | <i>SCL4</i> | <i>Ls</i> | <i>Citrus sinensis</i>      | orange1.1g006986m.g      | Phytozome |     |
| <b>Cc Ls</b>                   | <i>Ls</i>   | <i>Ls</i> | <i>Citrus clementina</i>    | Ciclev10008226m.g        | Phytozome |     |
| <b>Cc SCL4</b>                 | <i>SCL4</i> | <i>Ls</i> | <i>Citrus clementina</i>    | Ciclev10025169m.g        | Phytozome |     |
| <b>Am ERA</b>                  | <i>Ls</i>   | <i>Ls</i> | <i>Antirrhinum majus</i>    |                          | This work |     |
| <b>Mg Ls</b>                   | <i>Ls</i>   | <i>Ls</i> | <i>Mimulus guttatus</i>     | mgv1a017979m.g           | Phytozome |     |
| <b>Mg SCL4</b>                 | <i>SCL4</i> | <i>Ls</i> | <i>Mimulus guttatus</i>     | mgv1a018392m.g           | Phytozome |     |

|                                 |             |              |                             |                      |           |   |
|---------------------------------|-------------|--------------|-----------------------------|----------------------|-----------|---|
| <b>Sl Ls</b>                    | <i>Ls</i>   | <i>Ls</i>    | <i>Solanum lycopersicum</i> | Solyc07g066250.1     | Phytozome | 8 |
| <b>Sl SCL4</b>                  | <i>SCL4</i> | <i>Ls</i>    | <i>Solanum lycopersicum</i> | Solyc02g085340.1     | Phytozome |   |
| <b>St Ls</b>                    | <i>Ls</i>   | <i>Ls</i>    | <i>Solanum tuberosum</i>    | PGSC0003DMG400022244 | Phytozome |   |
| <b>St SCL4</b>                  | <i>SCL4</i> | <i>Ls</i>    | <i>Solanum tuberosum</i>    | PGSC0003DMG400014900 | Phytozome |   |
| <b>At SCL15<br/>(AtGRAS-25)</b> |             | <i>HAM</i>   | <i>Arabidopsis thaliana</i> | AT4G36710            | Phytozome |   |
| <b>AtGRAS-14</b>                |             | <i>HAM</i>   | <i>Arabidopsis thaliana</i> | AT2G45160            | Phytozome |   |
| <b>AtGRAS-23</b>                |             | <i>HAM</i>   | <i>Arabidopsis thaliana</i> | AT4G08250            | Phytozome |   |
| <b>OsGRAS-8</b>                 |             | <i>HAM</i>   | <i>Oryza sativa</i>         | LOC_Os02g44370       | Phytozome |   |
| <b>OsGRAS-45</b>                |             | <i>HAM</i>   | <i>Oryza sativa</i>         | LOC_Os11g06180       | Phytozome |   |
| <b>OsGRAS-13</b>                |             | <i>HAM</i>   | <i>Oryza sativa</i>         | LOC_Os03g15680       | Phytozome |   |
| <b>At SCR</b>                   |             | <i>SCR</i>   | <i>Arabidopsis thaliana</i> | AT3G54220            | Phytozome |   |
| <b>AtGRAS-28</b>                |             | <i>SCR</i>   | <i>Arabidopsis thaliana</i> | AT5G41920            | Phytozome |   |
| <b>OsGRAS-28</b>                |             | <i>SCR</i>   | <i>Oryza sativa</i>         | LOC_Os05g40710       | Phytozome |   |
| <b>OsGRAS-41</b>                |             | <i>SCR</i>   | <i>Oryza sativa</i>         | LOC_Os11g03110       | Phytozome |   |
| <b>AtGRAS-8</b>                 |             |              | <i>Arabidopsis thaliana</i> | AT1G63100            | Phytozome |   |
| <b>OsGRAS-32</b>                |             |              | <i>Oryza sativa</i>         | LOC_Os06g03710       | Phytozome |   |
| <b>At RGA</b>                   |             | <i>DELLA</i> | <i>Arabidopsis thaliana</i> | AT2G01570            | Phytozome |   |
| <b>OsGRAS-1</b>                 |             | <i>DELLA</i> | <i>Oryza sativa</i>         | LOC_Os01g45860       | Phytozome |   |
| <b>At SCL3<br/>(AtGRAS-5)</b>   |             | <i>SCL3</i>  | <i>Arabidopsis thaliana</i> | AT1G50420            | Phytozome |   |
| <b>OsGRAS-6</b>                 |             | <i>SCL3</i>  | <i>Oryza sativa</i>         | LOC_Os01g71970       | Phytozome |   |
| <b>OsGRAS-26</b>                |             | <i>SCL3</i>  | <i>Oryza sativa</i>         | LOC_Os05g31380       | Phytozome |   |
| <b>At SHR</b>                   |             | <i>SHR</i>   | <i>Arabidopsis thaliana</i> | AT4G37650            | Phytozome |   |
| <b>AtGRAS-16</b>                |             | <i>SHR</i>   | <i>Arabidopsis thaliana</i> | AT3G13840            | Phytozome |   |
| <b>OsGRAS-14</b>                |             | <i>SHR</i>   | <i>Oryza sativa</i>         | LOC_Os03g29480       | Phytozome |   |
| <b>OsGRAS-15</b>                |             | <i>SHR</i>   | <i>Oryza sativa</i>         | LOC_Os03g31880       | Phytozome |   |
| <b>At SCL13<br/>(AtGRAS-24)</b> |             | <i>PATI</i>  | <i>Arabidopsis thaliana</i> | AT4G17230            | Phytozome |   |
| <b>At SCL8<br/>(AtGRAS-30)</b>  |             | <i>PATI</i>  | <i>Arabidopsis thaliana</i> | AT5G52510            | Phytozome |   |

|                  |  |              |                             |                                 |           |  |
|------------------|--|--------------|-----------------------------|---------------------------------|-----------|--|
| <b>OsGRAS-12</b> |  | <i>PATI</i>  | <i>Oryza sativa</i>         | LOC_Os03g09280                  | Phytozome |  |
| <b>OsGRAS-22</b> |  | <i>PATI</i>  | <i>Oryza sativa</i>         | LOC_Os04g49110                  | Phytozome |  |
| <b>AtGRAS-1</b>  |  | <i>LISCL</i> | <i>Arabidopsis thaliana</i> | AT1G07520                       | Phytozome |  |
| <b>OsGRAS-2</b>  |  | <i>LISCL</i> | <i>Oryza sativa</i>         | LOC_Os01g62460                  | Phytozome |  |
| <b>OsGRAS-46</b> |  | <i>LISCL</i> | <i>Oryza sativa</i>         | LOC_Os11g47870                  | Phytozome |  |
| <b>OsGRAS-48</b> |  | <i>LISCL</i> | <i>Oryza sativa</i>         | LOC_Os11g47900                  | Phytozome |  |
| <b>OsGRAS-4</b>  |  |              | <i>Oryza sativa</i>         | LOC_Os01g67650                  | Phytozome |  |
| <b>OsGRAS-5</b>  |  |              | <i>Oryza sativa</i>         | LOC_Os01g67670 / LOC_Os01g71970 | Phytozome |  |

## SUPPLEMENTARY REFERENCES

1. Vincent, C. A. & Coen, E. S. A temporal and morphological framework for flower development in *Antirrhinum majus*. *Can. J. Bot.* **82**, 681–690 (2004).
2. Der, J. P., Barker, M. S., Wickett, N. J., dePamphilis, C. W. & Wolf, P. G. De novo characterization of the gametophyte transcriptome in bracken fern, *Pteridium aquilinum*. *BMC Genomics* **12**, 99 (2011).
3. Al-Dous, E. K. *et al.* De novo genome sequencing and comparative genomics of date palm (*Phoenix dactylifera*). *Nat. Biotechnol.* **29**, 521–527 (2011).
4. Li, X. *et al.* Control of tillering in rice. *Nature* **422**, 618–621 (2003).
5. Tian, C., Wan, P., Sun, S., Li, J. & Chen, M. Genome-wide analysis of the GRAS gene family in rice and *Arabidopsis*. *Plant Mol. Biol.* **54**, 519–532 (2004).
6. Greb, T. *et al.* Molecular analysis of the LATERAL SUPPRESSOR gene in *Arabidopsis* reveals a conserved control mechanism for axillary meristem formation. *Genes Dev.* **17**, 1175–1187 (2003).

7. Pysh, L. D., Wysocka-Diller, J. W., Camilleri, C., Bouchez, D. & Benfey, P. N. The GRAS gene family in Arabidopsis: sequence characterization and basic expression analysis of the SCARECROW-LIKE genes. *Plant J.* **18**, 111–119 (1999).
8. Schumacher, K., Schmitt, T., Rossberg, M., Schmitz, G. & Theres, K. The Lateral suppressor (Ls) gene of tomato encodes a new member of the VHIID protein family. *Proc. Natl. Acad. Sci. U. S. A.* **96**, 290–295 (1999).
